# Supplementary material for: Criminalisation of clients: reproducing vulnerabilities for violence and poor health among street-based sex workers in Canada—a qualitative study
Source: PubMed Central journal article supplement (PMC4054637; doi:10.1136/bmjopen-2014-005191), 2014-06-02
Supplement: bmjopen-2014-005191.draft_revisions.pdf [file bmjopen-2014-005191.draft_revisions.pdf]

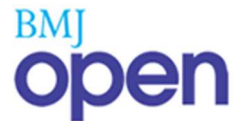

**CRIMINALISATION OF SEX BUYERS: INCREASING RISKS FOR VIOLENCE AND HIV/STI INFECTION AMONG STREET-BASED SEX WORKERS IN CANADA - A QUALITATIVE STUDY**

|                                 |                                                                                                                                                                                                                                                                                                                                                                                                                                                                                                                                                                                                                                                             |
|---------------------------------|-------------------------------------------------------------------------------------------------------------------------------------------------------------------------------------------------------------------------------------------------------------------------------------------------------------------------------------------------------------------------------------------------------------------------------------------------------------------------------------------------------------------------------------------------------------------------------------------------------------------------------------------------------------|
| Journal:                        | <i>BMJ Open</i>                                                                                                                                                                                                                                                                                                                                                                                                                                                                                                                                                                                                                                             |
| Manuscript ID:                  | bmjopen-2014-005191                                                                                                                                                                                                                                                                                                                                                                                                                                                                                                                                                                                                                                         |
| Article Type:                   | Research                                                                                                                                                                                                                                                                                                                                                                                                                                                                                                                                                                                                                                                    |
| Date Submitted by the Author:   | 05-Mar-2014                                                                                                                                                                                                                                                                                                                                                                                                                                                                                                                                                                                                                                                 |
| Complete List of Authors:       | Krüsi, Andrea; BC Centre for Excellence in HIV/AIDS, Pacey, Katrina; Pivot Legal Society, Taylor, Christina; BC Centre for Excellence in HIV/AIDS, Chettiar, Jill; BC Centre for Excellence in HIV/AIDS, Allan, Sarah; BC Centre for Excellence in HIV/AIDS, Bennett, Darcie; Pivot Legal Society, Montaner, Julio; BC Centre for Excellence in HIV/AIDS, ; University of British Columbia, Department of Medicine Kerr, Thomas; British Columbia Centre for Excellence in HIV/AIDS, ; University of British Columbia, Department of Medicine Shannon, Kate; BC Centre for Excellence in HIV/AIDS, ; University of British Columbia, Department of Medicine |
| <b>Primary Subject Heading</b>: | Qualitative research                                                                                                                                                                                                                                                                                                                                                                                                                                                                                                                                                                                                                                        |
| Secondary Subject Heading:      | Sexual health, HIV/AIDS, Public health                                                                                                                                                                                                                                                                                                                                                                                                                                                                                                                                                                                                                      |
| Keywords:                       | Sex work, Violence, Sexual Health, HIV/AIDS, Law                                                                                                                                                                                                                                                                                                                                                                                                                                                                                                                                                                                                            |
|                                 |                                                                                                                                                                                                                                                                                                                                                                                                                                                                                                                                                                                                                                                             |

SCHOLARONE™  
Manuscripts

1  
2  
3  
4 CRIMINALISATION OF SEX BUYERS: INCREASING RISKS FOR VIOLENCE  
5 AND HIV/STI INFECTION AMONG STREET-BASED SEX WORKERS IN  
6  
7  
8 CANADA  
9  
10 A QUALITATIVE STUDY  
11  
12  
13

14 A Krüsi,<sup>1</sup> K Pacey,<sup>2</sup> C Taylor,<sup>1</sup> J Chettiar,<sup>1</sup> S Allan,<sup>1</sup> D Bennett, JS Montaner,<sup>1,2</sup> T Kerr,<sup>1,2</sup> K  
15 Shannon<sup>1,2</sup>  
16  
17  
18  
19

- 20  
21 1. Gender and Sexual Health Initiative, British Columbia Centre for Excellence in  
22 HIV/AIDS, St. Paul's Hospital, 608-1081 Burrard Street, Vancouver, BC,  
23 CANADA, V6Z 1Y6  
24  
25 2. Pivot Legal Society, 121 Heatley Avenue, Vancouver, CANADA, V6A 3E9  
26  
27 3. Department of Medicine, University of British Columbia, St. Paul's Hospital,  
28 608-1081 Burrard Street, Vancouver, BC, CANADA, V6Z 1Y6  
29  
30  
31  
32  
33

34 **Send correspondence to:**

**Kate Shannon, PhD, MPH**  
Associate Professor, Department of Medicine  
University of British Columbia  
Director, Gender and Sexual Health Initiative  
B.C. Centre for Excellence in HIV/AIDS  
St. Paul's Hospital, 608-1081 Burrard Street,  
Vancouver, B.C., V6Z 1Y6, Canada  
**Tel:** (604) 804-9459  
**Fax:** (604) 806-9044  
**Email:** [gshi@cfenet.ubc.ca](mailto:gshi@cfenet.ubc.ca)

35  
36  
37  
38  
39  
40  
41  
42  
43  
44  
45  
46  
47  
48  
49  
50  
51  
52  
53  
54  
55  
56  
57  
58  
59  
60

Keywords: sex work, violence, HIV/AIDS, sexual health, legislation

Word Count: 5562

Tables: 4

Figures: 1

## ABSTRACT

**Objectives:** To explore how criminalisation and policing of sex buyers (clients) rather than sex workers, shapes sex workers' working conditions and sexual transactions including risk of violence and HIV/STI infections.

**Design:** Qualitative and ethnographic study triangulated with publicly available police statistics.

**Setting:** Vancouver, Canada provides a unique opportunity to evaluate the impact of policies that criminalize clients as the local police department adopted a sex work enforcement policy in January 2013 that prioritize sex workers' safety over arrest, while continuing to target enforcement efforts towards clients.

**Participants:** 26 female and 5 transgender street-based sex workers (n=31) participated in semi-structured interviews about their working conditions. All participants had experience with street-based sex work and had exchanged sex for money in the previous 30 days in Vancouver.

**Outcome measures:** Thematic analysis of interview transcripts and ethnographic field notes focused on how police enforcement of clients shaped sex workers' working conditions and sexual transactions, including risk of violence and HIV/STI infections, over an 11 month period post-policy implementation (January-November 2013).

**Results:** Sex workers' narratives and ethnographic observations indicated that while police sustained a high level of visibility they eased charging or arresting sex workers and showed increased concern for their safety. However, participants' accounts and police statistics indicated continued police enforcement of clients. This profoundly impacted the safety strategies sex workers employed. Sex workers continued to mistrust police, had to rush screening clients, and were displaced to outlying areas with increased risks of violence, including being forced to engage in unprotected sex.

**Conclusions:** These results suggest when police target clients, sex workers continue to be at increased risk of violence and adverse health outcomes, including HIV/STI infections. The current findings support decriminalisation of sex work to ensure work conditions that support the health and safety of sex workers in Canada and globally.

**Strengths and limitations of this study:**

- This is the first empirical study of how criminalization and policing of sex buyers shapes sex workers' risks for violence and poor health, outside of a small body of research in Scandinavia
- This study draws on data of the lived experiences of sex workers from 31 qualitative interviews triangulated with ethnographic observations, and publicly available police statistics.
- The data represented in this study reflect the experiences of primarily street-based sex workers, disproportionately impacted by policing and thus, may not be representative of other segments of the sex industry
- This study is a qualitative evaluation post-implementation of a new enforcement policy targeting sex buyers, rather than sex workers, and as such, likely underestimates the full impact of any legislative change to criminalize the purchasing of sex

## INTRODUCTION

There is now a well-established body of epidemiological and social science research globally pointing to the negative impact of legislation and policies that criminalize sex work on violence and other health risks including HIV/STI infection among female sex workers.<sup>1-7</sup> The criminalisation of some or all aspects of prostitution remains the dominant legal approach globally,<sup>1 4</sup> despite growing empirical evidence and clear international guidelines by the World Health Organization and United Nations bodies calling for full decriminalisation of sex work as necessary to promoting the health and human rights of sex workers. (see Supplementary materials for a summary of legal and regulatory responses to sex work)

Enforcement-based approaches and policing within criminalized frameworks have consistently been linked to elevated risks for violence, and reduced ability to negotiate safer sex transactions, including prevention of HIV and other sexually transmitted infections (STIs).<sup>1-3 6 8</sup> Previous research indicates that in criminalized settings, policing strategies can range from surveillance and crackdowns to arrests or threats of arrest, intimidation by police, and police violence can be frequent and go largely unreported.<sup>2 9-12</sup> These risks are amplified for the most marginalized and visible sex workers, those living poverty and working on the street.<sup>10 13 14</sup> In an effort to avoid police, sex workers often move to outlying secluded areas to meet and service clients where there are few to no protections from violence and abuse, and reduced ability to refuse unwanted clients or services, including client demands for sex without a condom.<sup>9 10 15-17</sup> Criminalisation and policing force sex workers to rush or forgo the

1  
2  
3 process of screening prospective clients or negotiating the terms of sexual transactions  
4  
5 before getting in a vehicle, with clients, which places sex workers at increased risk of  
6  
7 physical violence, rape and HIV/STI infection.<sup>9 18 19</sup> Criminalisation of sex work also  
8  
9 impedes access to safer indoor work environments, particularly for those most socially  
10  
11 and economically marginalized. Previous research undertaken in Canada and  
12  
13 internationally has indicated that indoor sex work environments with structural  
14  
15 supports including supportive management policies, security measures, and access to  
16  
17 HIV/STI prevention resources, increase sex workers' control over sexual transactions  
18  
19 with clients, including protections from violence and HIV/STI infections.<sup>17 20 21</sup>  
20  
21  
22  
23  
24

25  
26 The criminalisation of sex work has also been found to prevent sex workers from  
27  
28 reporting violent perpetrators and seeking legal recourse after physical or sexual  
29  
30 assault.<sup>9 22</sup> There is also growing evidence that legislation criminalizing sex work  
31  
32 constitutes a significant barrier to accessing health care services, including primary care,  
33  
34 HIV treatment and prevention, and sexual health services.<sup>16 23 24</sup> Additionally, stigma  
35  
36 and discrimination against sex workers are significantly amplified in settings where sex  
37  
38 work is criminalized, and further reduce sex workers ability to access police protections  
39  
40 or health and social support services.<sup>23 25</sup>  
41  
42  
43  
44  
45

#### 46 **'Demand Criminalisation'**

47

48 Over the past decade there has been increased interest by a number of higher  
49  
50 income countries to attempt to eradicate prostitution through 'demand  
51  
52 criminalisation', which criminalizes the purchase, but not the selling, of sexual services.  
53  
54 Sweden, Norway, Iceland, and most recently France, opted for 'demand criminalisation',  
55  
56  
57  
58  
59  
60

1  
2  
3 despite the lack of evidence supporting this legal framework. Similarly, the European  
4  
5  
6 Union has also recently voted in favour of implementing this approach.<sup>26</sup> ‘Demand  
7  
8 criminalisation’ was first implemented in Sweden in 1999. The primary objective of the  
9  
10 law is to eradicate prostitution by eliminating demand. However, evidence from  
11  
12 Sweden, indicates that the law has been unsuccessful in meeting this objective.<sup>27</sup>  
13  
14 Instead, a number of unintended consequences have been reported – namely, that it  
15  
16 drives sex workers and clients underground to more clandestine locales, and is difficult  
17  
18 to enforce due to the unwillingness of sex workers to testify against their clients.<sup>28 29</sup>  
19  
20  
21  
22  
23

### 24 **The Canadian Context**

25  
26 Canada is at a critical time in the evolution of its legal response to sex work. In  
27  
28 December 2013, Canada’s highest court, the Supreme Court of Canada, unanimously  
29  
30 struck down Canada’s core prostitution laws<sup>30</sup>. Deeming them unconstitutional for  
31  
32 violating sex workers’ constitutional rights, including the ability to protect themselves  
33  
34 from violence and HIV/STI infection. The three laws struck down included prohibitions  
35  
36 on communicating in public for the purpose of prostitution, operating a bawdy house,  
37  
38 and living off the avails of prostitution. Similar to the United Kingdom and other  
39  
40 commonwealth countries, the Canadian Criminal Code has never criminalized the buying  
41  
42 or selling of sex *per se*, however the laws prohibit virtually every other aspect of sex  
43  
44 work, making it effectively impossible to engage in sex work legally. The hypocrisy of  
45  
46 quasi-criminalized prostitution laws and the unintended harms on sex workers’ health,  
47  
48 safety, and human rights were a critical reasons for the Supreme Court of Canada  
49  
50 decision.<sup>30</sup> The Court suspended the decision for one year to provide the Canadian  
51  
52  
53  
54  
55  
56  
57  
58  
59  
60

1  
2  
3 government time to respond; by either removing the struck down laws from the  
4  
5 Criminal Code (and thus decriminalize sex work); or bringing the laws governing  
6  
7 prostitution in line with the decision. Since the decision the Canadian government has  
8  
9 moved quickly towards calling for criminalizing the purchase of sex,<sup>31</sup> despite a lack of  
10  
11 evidence that this change would address the harms associated with criminalized and  
12  
13 quasi-criminalized approaches of regulating prostitution.  
14  
15  
16  
17

### 18 **New Sex Work Enforcement Policy in Vancouver, Canada**

19  
20 Vancouver, Canada provides a unique opportunity to evaluate the potential  
21  
22 impact of laws and policies that criminalize sex buyers (clients). In January 2013, the  
23  
24 Vancouver Police Department (VPD) officially adopted new sex work enforcement  
25  
26 guidelines that shifted the focus in policing sex work away from arresting or pressing  
27  
28 charges against sex workers. These sex work enforcement guidelines emerged after two  
29  
30 decades of tremendous violence and murder of street-based sex workers and strong  
31  
32 pressure from sex work and other community organizations, legal experts, and  
33  
34 academic researchers calling for reforms to local policing practices to better protect,  
35  
36 rather than increase harm, isolation and risk of violence to sex workers.<sup>32</sup> The sex work  
37  
38 policing guidelines set out a strategy to ‘open communication’ with sex workers and  
39  
40 prevent violence against sex workers through prioritizing their safety over enforcement  
41  
42 measures such as arrest.<sup>33</sup> However, the policing guidelines did not address changes in  
43  
44 enforcement of clients. In fact, on their website the VPD confirms that they continue to  
45  
46 “target both pimps and customers, in locations where the impact of the sex trade has  
47  
48  
49  
50  
51  
52  
53  
54  
55  
56  
57  
58  
59  
60



1  
2  
3 become unacceptable".<sup>34</sup> The result is that as of January 2013, Vancouver has been a  
4  
5  
6 de facto 'demand criminalisation' environment.  
7

8  
9 Therefore, the objectives of this study are to evaluate how a new local  
10  
11 enforcement strategy that targets clients, but not sex workers, shape sex workers'  
12  
13 interactions with police and negotiation of their working conditions and sexual  
14  
15 transactions with clients, with a particular focus on protections from violence and  
16  
17 HIV/STI infections.  
18  
19

## 20 21 **METHODS**

22  
23 This study is situated within a larger NIH-funded longitudinal qualitative and  
24  
25 ethnographic study investigating the features of the physical, social and policy  
26  
27 environments shaping sexual health, violence, HIV/STI risks and access to care for sex  
28  
29 workers in Vancouver, Canada. The research builds on ongoing community partnerships  
30  
31 developed since 2004 with a Community Advisory Board comprised of community, sex  
32  
33 work and health support agencies, and runs alongside a sister epidemiological cohort of  
34  
35 over 800 street and off-street sex workers, known as AESHA (An Evaluation of Sex  
36  
37 Workers Health Access).<sup>35</sup>  
38  
39  
40  
41  
42

43  
44 This study draws on ethnographic field work of street-based sex work scenes and  
45  
46 qualitative semi-structured interviews with street-involved sex workers about their  
47  
48 working conditions, interactions with police, and negotiations of health and safety with  
49  
50 clients, in the City of Vancouver, Canada over 11 months (January-November 2013),  
51  
52 following the implementation of the new sex work enforcement guidelines by the  
53  
54 Vancouver Police Department (VPD) in January 2013. Empirical data were triangulated  
55  
56  
57  
58  
59  
60

1  
2  
3 with publicly available police statistics that report on prostitution related criminal code  
4  
5 offences in the City of Vancouver.<sup>36</sup>  
6  
7

8  
9 The lead author (AK) and co-author (JC) conducted more than 40 hours of  
10  
11 ethnographic observation within known street-based sex work strolls in the City of  
12  
13 Vancouver to assess level of police presence; shifts in working areas; and police, sex  
14  
15 worker and client interactions. All ethnographic observations were conducted within the  
16  
17 context of regular weekly AESHA outreach shifts, which included provision of harm  
18  
19 reduction supplies, food and referrals to social and health supports. Observation  
20  
21 sessions lasted three to five hours and took place during peak hours of sex work activity  
22  
23 between 10pm and 3am. AK and JC recorded brief fieldnotes in a research log during  
24  
25 the observation sessions and elaborated on them after each observation outing.  
26  
27  
28  
29

30  
31 Interview participants were recruited through purposive sampling from the  
32  
33 longitudinal cohort (AESHA), and aimed to reflect variation in demographics (e.g., age,  
34  
35 ethnicity, gender) and work environments (e.g., geographic neighbourhoods; variation  
36  
37 in street and off-street solicitation and transaction spaces). Eligibility criteria for the in-  
38  
39 depth interviews included: 1) current sex work defined as exchanged sex for money in  
40  
41 the last 30 days in City of Vancouver; 2) female gender (transgender-inclusive); and 3)  
42  
43 aged 18 years or older. While the larger qualitative and ethnographic research and  
44  
45 AESHA projects focus on a diversity of street and off-street (e.g., indoor, online) sex  
46  
47 work environments, this specific study aimed to examine the experiences of street-  
48  
49 involved sex workers (i.e., those soliciting and/or servicing on the street) given  
50  
51 substantial data that criminalisation and enforcement disproportionately target this  
52  
53  
54  
55  
56  
57  
58  
59  
60

1  
2  
3 segment of the sex industry.<sup>10 13 14</sup> It should be noted that even within this context,  
4  
5 many street-involved sex workers worked in both street and off-street venues, including  
6  
7 online and indoor informal and formal venues (see results).  
8  
9

10  
11 The 31 semi-structured interviews were conducted by two experienced  
12  
13 qualitative interviewers (CT, AK) and facilitated by an interview guide encouraging broad  
14  
15 discussions of working conditions, police presence and interactions, and negotiation of  
16  
17 health and safety in transactions with clients, post-VPD policy implementation (January  
18  
19 2013). The interview guide was developed based on existing knowledge of the research  
20  
21 team and in collaboration with our community partners. We conducted all interviews at  
22  
23 one of two field offices in the City of Vancouver. Interviews lasted between 45 and 90  
24  
25 minutes, were audio-recorded, transcribed verbatim and checked for accuracy. All  
26  
27 participants provided informed consent and were remunerated with a CAD \$30  
28  
29 honorarium. The study holds ethical approval by the Providence Healthcare/University  
30  
31 of British of Colombia Research Ethics Board.  
32  
33  
34  
35  
36  
37

38  
39 Interview transcripts and ethnographic data were analyzed using thematic  
40  
41 analyses to examine sex worker's interactions with police and negotiation of their  
42  
43 working conditions and sexual transactions with clients, including protections from  
44  
45 violence, abuse, and HIV/STI infections, post-policy implementation. All textual data  
46  
47 were analyzed using an inductive and iterative process facilitated by the qualitative  
48  
49 analysis software ATLAS.TI V7. The initial coding framework was based on key themes  
50  
51 reflected in the interview guide, participants' accounts and fieldnotes. More  
52  
53  
54  
55  
56  
57  
58  
59  
60

1  
2  
3 conceptually-driven substantive codes (e.g., trust, discrimination, control over sex work  
4 transactions) were then applied.  
5  
6

## 7 8 **RESULTS:** 9

### 10 **Sample characteristics** 11

12  
13 The sample for semi-structured interviews included 26 female sex workers and 5  
14 transgender sex workers (total n=31). The mean age of participants was 38 years (range:  
15 24-53). Overall, 21 identified as Caucasian, 8 were of Aboriginal ancestry and 2  
16 participants were of other visible minorities. All participants had experience with street  
17 solicitation. The majority (77%, n= 24) reported street solicitation as their primary way  
18 of connecting with clients, while others (23%, n= 7) primarily used phone/text  
19 solicitation to connect with clients. Just over half (55%, n= 17) primarily serviced clients  
20 in vehicles or outdoor public spaces, while 45% (n= 14) primary serviced clients in  
21 informal indoor venues (e.g., hotels, client's place, or their home).  
22  
23  
24  
25  
26  
27  
28  
29  
30  
31  
32  
33  
34

### 35 **Sex Workers' Experiences with New Sex Work Enforcement Guidelines** 36

37  
38 Participants' narratives and ethnographic observations indicated that while  
39 police sustained a high level of visibility they eased charging or arresting sex workers  
40 and showed increased concern for their safety. Most participants experienced a gradual  
41 change in policing over a number of years rather than an abrupt change in policing with  
42 the publication of new sex work enforcement policy in January 2013. Many women  
43 Some women felt that they were interacting less with police as long as they solicit  
44 clients in two separate areas of the city that function as de facto sex work tolerance  
45 zones.  
46  
47  
48  
49  
50  
51  
52  
53  
54  
55  
56  
57  
58  
59  
60

1  
2  
3  
4  
5  
6  
7  
8  
9  
10  
11  
12  
13  
14  
15  
16  
17  
18  
19  
20  
21  
22  
23  
24  
25  
26  
27  
28  
29  
30  
31  
32  
33  
34  
35  
36  
37  
38  
39  
40  
41  
42  
43  
44  
45  
46  
47  
48  
49  
50  
51  
52  
53  
54  
55  
56  
57  
58  
59  
60

*There's more [police] presence. There's not very many more interactions. Before the interactions were always there. They'd come and pull you right outta car and, like push you over. They'd get away with it back then. You know. But now it's like they don't, interact. Participant 2*

The vast majority of participants reported that their interactions with police when soliciting sex work clients are more positive and generally focus on their safety.

*Every time they pull you over it's strictly to ask you how you're doing, how things are. If there's any bad dates you want to report. Participant 5*

While participants in this study viewed this change as positive, the continued police enforcement of clients severely limited any positive impact of this change on their overall working conditions, risks for violence, or negotiation of sexual risk reduction with clients.

### **Continued Police Enforcement of Sex Buyers (Clients)**

Sex workers' narratives indicated that while police tolerated sex work related activities in two separate de facto sex work zones, clients continued to be at risk of police scrutiny. Indeed, according to official police statistics sex work-related Criminal Code offences rose from an all time low of 47 in 2012 to 71 in 2013 (see Figure1).<sup>36</sup> This represents a 51 percent increase in prostitution-related offences since the announcement of the VPD sex work enforcement guidelines in January 2013.

Figure 1: Prostitution-Related Criminal Code Offenses Vancouver 2010-2013<sup>36</sup>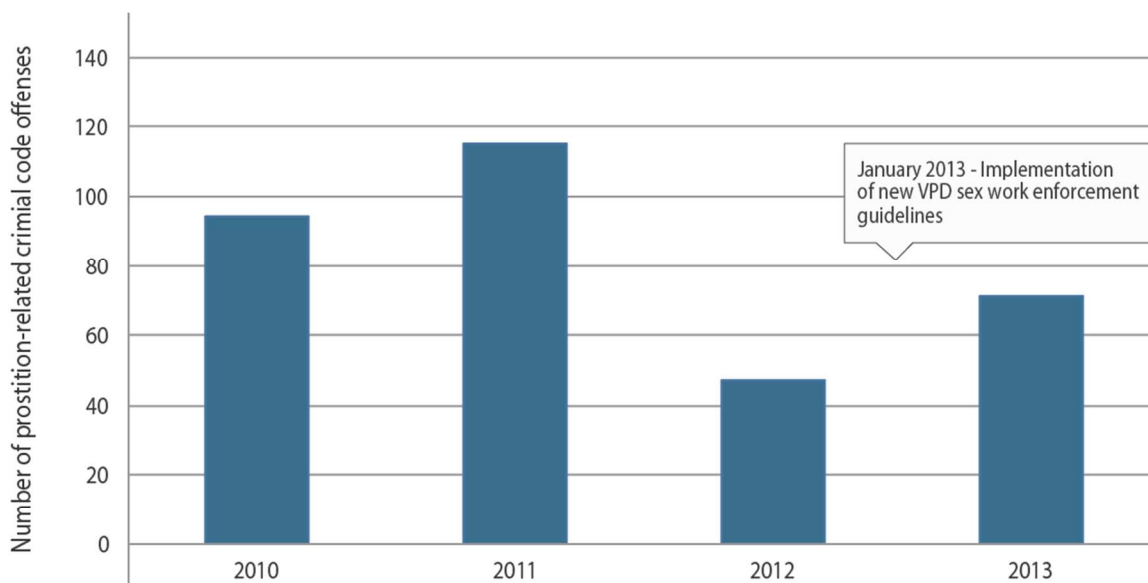

Unfortunately, no statistics are available regarding the proportion of sex workers versus clients who were charged. However, participants' accounts indicate that the 51 percent rise in prostitution related offences likely reflects an increase of enforcement efforts targeting clients, as the majority of sex workers felt that their clients were currently the main targets of police.

*I think the Johns or clients that I have probably worry the most about police.*  
Participant 26

*[Clients] do get stopped. A couple of my regulars they've been chased off the street, they're not allowed to come downtown anymore. Down here they're bad for that. I guess, it's more so not the girls they go after - it's the guys.*  
Participant 31

Most participants reported that clients are at risk of being pulled over by police even before actually negotiating a sex work transaction by circling around known sex

1  
2  
3 work areas. However, participants' narratives indicated that the riskiest time for  
4  
5 attracting police attention was the moment when women entered the vehicle of a  
6  
7 prospective client. Women expressed that while they used to be the main target of  
8  
9 police, the more recent experiences generally ended with the police allowing sex  
10  
11 workers to leave, often without checking for outstanding warrants. Clients were being  
12  
13 detained by police, and issued either a warning or a fine.  
14  
15  
16  
17  
18

19 *Right now when they [police] pull you over they let you, the girl go, keep the*  
20 *guy. Before they would separate you and then make a big investigation. Try*  
21 *to catch you in lies or intimidate you and make you nervous and try to say*  
22 *you can get more charges. Participant 19*  
23  
24

25 *One of my regulars, they gave him a five-hundred dollar disturbing the peace*  
26 *ticket. And they didn't run my name through. They just come out of nowhere,*  
27 *right? [Yeah, was it just for you getting in the car?] Yeah, I guess that was*  
28 *just the punishment, you know what I mean? So, I saw the guy a few times*  
29 *afterwards and he was saying he was going to fight and wanted me to be a*  
30 *witness and then I guess he thought afterwards, geez no. He told me he paid*  
31 *it online, I guess he has a family and that and he just wanted it to go away.*  
32 *Participant 4*  
33  
34  
35

### 36 **Criminalisation of Clients: Limited Effect on Deterrence of Sex Work**

37  
38 Sex workers reported that when police target clients, some clients are  
39  
40 deterred from purchasing sex on the street.  
41  
42

43  
44 *No one will pull over if there's a car, a police car near you. It's, like, if they*  
45 *see the lights they'll disappear. You can see the difference in traffic. They're*  
46 *just gone. Participant 18*  
47  
48

49 Some sex workers, however, felt that rather than preventing clients from purchasing  
50  
51 sex, police presence resulted in potential clients seeking out sex workers in a different  
52  
53 area of the city.  
54  
55  
56  
57  
58  
59  
60

1  
2  
3  
4 *Once the guy that's looking for a woman sees a cop, in the neighbourhood,*  
5 *he's scared. So he'll go to another neighbourhood and find another woman*  
6 *somewhere.* Participant 28  
7

8  
9 For participants in this study, the reality of living in poverty, and  
10 marginalization often combined with illicit substance use, meant that even when  
11 police target clients, sex workers report that they continue to work for the obvious  
12 reason of earning an income. Ethnographic observation and interview narratives  
13 indicated that police enforcement of clients had limited to no effect on deterring  
14 women from engaging in street-based sex work (Table 1). Indeed, for many  
15 participants the enforcement of clients forced them to spend longer hours on the  
16 street to earn an income. Thus contrary to the objectives of 'demand  
17 criminalisation', impeding sex workers ability to engage with potential clients did  
18 not result in less street-based sex work for these women. Instead, having access to  
19 fewer clients meant it was harder to earn an income and forced sex workers to  
20 accept clients or services (e.g. sex without a condom) that they would otherwise  
21 reject due to safety concerns, this directly increased risks for physical and sexual  
22 violence and HIV/STI infection.  
23  
24  
25  
26  
27  
28  
29  
30  
31  
32  
33  
34  
35  
36  
37  
38  
39  
40  
41  
42  
43  
44  
45  
46  
47  
48  
49  
50  
51  
52  
53  
54  
55  
56  
57  
58  
59  
60



**Table 1: Criminalisation of Clients: Limited Effect on Deterrence of Sex Work Sex Worker Narratives**

*While they're going around chasing johns away from pulling up beside you, I have to stay out for longer [...] Whereas if we weren't harassed we would be able to be more choosy as to where we get in, who we get in with you know what I mean? Because of being so cold and being harassed I got into a car where I normally wouldn't have. The guy didn't look at my face right away. And I just hopped in cause I was cold and tired of standing out there. And you know, he put something to my throat. And I had to do it for nothing. Whereas I woulda made sure he looked at me, if I hadn't been waiting out there so long. Participant 8*

*It pisses me off that they [the police] are there because basically what it comes down to is the shortest time that I'm out there, the shorter I'm on the street and the better I'm paid. But you [police] stand out there and you fuck up my business and scare away my dates. The longer I'm out there my chances of getting sick, raped, robbed, beat up whatever are greater so. Participant 6*

*Of course, 'cause no one's [clients] going to stop with them there. I'm not going to go home. So they're [police] not really doing anything, they're just keeping me out there longer. Really, if they would just leave me alone, I'd get a date and go home and they wouldn't see me. But that way I end up staying out there for hours 'cause I'm not going home empty-handed so I don't know what they think they're really achieving. Participant 10*

### **Criminalisation of Clients: Severely limits sex workers' safety strategies**

Analysis of the sex workers' narratives, reveal three key mechanisms by which criminalisation and police targeting of clients severely impacts sex workers' ability to negotiate their working conditions and transactions with clients, including protections from violence and HIV/STI infections.

#### *1. Inability to Screen Clients and Negotiate Terms of Sexual Transactions*

Sex workers' narratives emphasized that, in the context where clients continue to be police targets, it remains in both the clients' and sex workers' interest not to get pulled over by police. Therefore, sex workers continue to be forced to severely limit or

1  
2  
3 forego screening of prospective clients or negotiating the terms of sex work transactions  
4  
5  
6 (e.g. fee, sexual services, condom use) before getting into a vehicle (Table 2). In addition  
7  
8  
9 to entering a prospective client's car swiftly, participants reported that in order to  
10  
11 reduce the risk of attracting police attention, potential clients point them to an alleyway  
12  
13 away from the main street with limited lighting to allow them to enter the vehicle  
14  
15 undetected by police (Table 2). Policing of clients thus directly undermines sex workers  
16  
17 ability to **screen potential clients** including, checking "bad date" sheets for past violent  
18  
19 perpetrators, detecting possible weapons, or intoxication; and **negotiating the terms of**  
20  
21 **the sexual transactions**, including where the date will take place, the fee and types of  
22  
23 sexual services, and use of condoms, before entering a vehicle. These practices of  
24  
25 screening and negotiating the terms of transactions have both been well documented as  
26  
27 critical to sex workers' ability to control their health and safety, including protections  
28  
29 from violence, abuse and HIV/STI infection.<sup>15 17 19</sup>  
30  
31  
32  
33  
34  
35  
36  
37  
38  
39  
40  
41  
42  
43  
44  
45  
46  
47  
48  
49  
50  
51  
52  
53  
54  
55  
56  
57  
58  
59  
60

**Table 2: Criminalisation of Clients: Severely limits sex workers' safety strategies**  
**Sex Worker Narratives**

*Well, usually I try to hop in the car right away, right? 'Cause I don't want to get seen talking, in case a cop drives by or something. [...] I'll hop in and then we can like negotiate and talk, you know? First I like to make sure that nobody's around or following or anything. Participant 31*

*To avoid police they [clients] drive by couple times and they point. They point at like a place where nobody's driving by. So they point and that means to go follow them with the vehicle and then they'll stop [...] They go somewhere different in an alley or something. They just leave like the window open and then you just, get in. [But would you talk to them first?] Um no well when they're trying to avoid police like that you just get into the vehicle, right. Participant 24*

*Sometimes the guy will drive up and just sort of wave or point to go down the alley or something like that somewhere else where he can pick me up. [How does that affect your safety?] You never know who it is right? And you can't really see his face, can't really see anything they could have a gun in their hand or. You know what I mean they could be a little bit drunk or something if you can't really see them very clearly, you know? And you don't you can't say hi or whatever before you get in. You have to just hurry up before the cops come. Participant 9*

Prior to the VPD policy, police frequently engaged in undercover operations in order to target sex workers and their clients. This practice continues to shape sex work transactions and, in the context of sustained criminalisation of clients, undercover operations negatively affect the ability of sex workers to screen their clients or negotiate the terms of sexual transactions. Participants' accounts indicated that, rather than trying to assess the safety of entering a vehicle of a prospective client and negotiating the terms of the transaction, the initial interaction with a client is dictated by determining whether the sex worker is an undercover police officer. This usually involves both the client and sex worker touching each other, due to the belief that undercover police officers are not allowed to engage in bodily contact without identifying themselves as police.

1  
2  
3 *Normally when you get picked up, you go: Are you a cop? No, are you?*  
4 *Nope. Prove it. And you, touch each other just to make sure, right? 'Cause*  
5 *cops can't do that. So that's the rule, if you're undercover you can't touch*  
6 *someone. Normally, a guy'll touch my boob, I'll touch his crotch. Or he'll*  
7 *touch my crotch, I'll touch his, right? That's just to verify okay, you're not a*  
8 *cop, right?* Participant 3  
9  
10

## 11 12 2. Displacement to Isolated Areas 13

14  
15 Sex workers' accounts further indicated that, in the context of continued  
16  
17 criminalisation of clients, many clients demand on engaging in sex work  
18  
19 transaction away from known sex work areas where there is heightened police  
20  
21 presence. Participants reported that being alone with clients in often unknown,  
22  
23 secluded, industrial areas where there is little chance for help puts women at  
24  
25 increased risk of violence and rape and reduces their ability to negotiate the  
26  
27 transaction on their terms, elevating their risks for client condom refusal and  
28  
29 HIV/STI infection (Table 3).  
30  
31  
32  
33  
34  
35  
36  
37  
38  
39  
40  
41  
42  
43  
44  
45  
46  
47  
48  
49  
50  
51  
52  
53  
54  
55  
56  
57  
58  
59  
60

Table 3: **Displacement to Isolated Areas**  
**Sex Worker Narratives**

*Clients worry [about police]. Like for me I don't like going outside the neighborhood, right. Cause, you know what about if the guy turns out to be an asshole. [...] That's how I do loose dates by not going where I'm supposed to cause they're afraid of cops. [So do you turn dates down sometimes?] Yeah sometimes but not all the time cause when I'm I'm really in need of money I will maybe try and go. But then I just try and get a good feel of them first. Participant 24*

*Clients are worried about police. To avoid police they wanna move to a different area. I don't want to go out of my zone right. [...] Once you get out there, like you know their turf so it's harder for me cause it's their comfort zone or, so hey act differently, you know what I mean. Yeah it never ends up good. Participant 12*

*We try to get away from the area as quick as possible. You know. So that we're not in the area. Right. The farther away you get from [name of sex work stroll], the better it is. You're not gonna get pulled over right? I'm just a little nervous as it's so quiet down there by [industrial area]. Participant 8*

### 3. Inability to Access Police Protections

The main objective of the police enforcement guidelines is to foster more trusting relationships between sex workers and police and prioritize the safety of sex workers in any police interactions. A striking feature of many sex workers' accounts was that police inquiring about their safety was perceived as a nuisance at best, and a form of police harassment, at worst. In a context where clients continue to be police enforcement targets, participants' narratives indicated it is difficult for police to fulfill their stated objective of prioritizing the safety of sex workers. Even conversations between sex workers and police can have a destabilizing effect, as any police interactions may scare away clients and have the potential to raise suspicion that a sex worker might be an undercover police officer (Table 4).

1  
2  
3 Similarly, an important aspect of sex workers' safety is the ability to report theft,  
4  
5 violence and sexual harassment to police. Currently however, the majority of sex  
6  
7 workers voiced reservations about reporting such incidents to police. Many participants,  
8  
9 drawing on historic discrimination and maltreatment by police, doubted that police  
10  
11 would take their complaints seriously and voiced that the continued criminalisation of  
12  
13 clients constituted a significant barrier to reporting violence to police as any information  
14  
15 about where they work could be used to refine enforcement strategies targeting clients.  
16  
17  
18  
19  
20

21 **Table 4: Inability to Access Police Protections**  
22 **Sex Worker Narratives**

23 Destabilizing effect of police safety checks

24  
25  
26 *It's a drag, you know? I'm out there to make money, not waste twenty minutes talking*  
27 *to them [police]. And then I'm talking to them and half the dates that see me talking to*  
28 *them now think maybe I'm a cop, so they don't wanna stop, now they know the cops are*  
29 *around, they don't wanna stop, or they wonder what I've done to attract the cops so*  
30 *they don't wanna stop, like, it's just a hassle, you know? Participant 10*

31  
32  
33 *If the clients see you talking to the cops then they don't pick you up. [When police talk to*  
34 *me] they're respectful but they know that they're wasting my time so. They can do*  
35 *whatever they want. They're fucking up everything. Participant 18*

36  
37  
38 Reporting violence to police

39  
40  
41 *No I would never go to the cops [to report violence]. Because it makes it look like, we*  
42 *shouldn't be out there like we can't take care of ourselves. I feel like if I went and*  
43 *reported some of these things that it might do more harm to the working profession*  
44 *than do good. So I don't do that. Basically we have to fend for ourselves. They don't*  
45 *really like us to begin with. Participant 7*

46  
47  
48 *I've needed the police's help with bad dates and they've done absolutely nothing. The*  
49 *fact that it's not legalized you kinda can't do it, you know. Participant 10*  
50  
51  
52  
53  
54  
55  
56  
57  
58  
59  
60

## DISCUSSION

These findings suggest that criminalisation and policing strategies that target clients reproduce the harms, created by the criminalisation of sex workers, in particular, risks for violence and abuse. Contrary to the goal of demand criminalisation, our findings suggest that this approach has limited to no effect on preventing street-based sex work. Our analysis provides strong empirical evidence of the lived experience of sex workers indicating that the continued criminalisation and policing of clients, even when sex workers are no longer police targets, profoundly impacted sex workers ability to negotiate their working conditions and health and safety. Collectively, this research suggests that displacement to isolated areas and inability to screen clients or negotiate the terms of sexual transactions directly reduced sex workers' ability to refuse unwanted clients or services (e.g. sex without a condom), thereby increasing risks for physical and sexual violence and HIV/STI infection. In addition, despite improved relations between sex workers and police, continued police targeting of clients created mistrust of police and severely limited sex workers ability to access police protections.

Our findings indicate a shared interest of sex workers and clients to remain undetected by police while making their initial contact, therefore client screening had to be rushed, if not fully absent, and take place in secluded areas away from street lighting and other passers by. These findings reflect earlier epidemiological and social science research that have consistently demonstrated a direct correlation between criminalisation and policing of street-based sex work and elevated odds of physical violence and rape, as well as HIV/STI infection through client condom refusal.<sup>6 10 11 15 5</sup>

1  
2  
3  
4  
5  
6  
7  
8  
9  
10  
11  
12  
13  
14  
15  
16  
17  
18  
19  
20  
21  
22  
23  
24  
25  
26  
27  
28  
29  
30  
31  
32  
33  
34  
35  
36  
37  
38  
39  
40  
41  
42  
43  
44  
45  
46  
47  
48  
49  
50  
51  
52  
53  
54  
55  
56  
57  
58  
59  
60

<sup>18</sup> This work has identified screening of prospective clients as essential to allowing sex workers to take safety precautions, including agreement on where the transaction will take place, checking 'bad date' reports describing the personal characteristics and/or vehicle of known violent perpetrators, and checking for the presence of weapons and intoxication.<sup>12</sup> In addition to screening, negotiating the terms of sexual transactions with clients before entering the vehicle, including the fee, and types of sexual services, remains critical for sex workers to negotiate the terms of their work, and avoid risky sexual encounters (e.g. unprotected sex). Without the opportunity to screen clients or safely negotiate the terms of sexual services, research has shown that sex workers face increased risks of physical violence, rape, and HIV/STI infection through client condom refusal.<sup>15 17 18 37 38</sup> Our findings resonate with evaluations from Sweden that reported, since the implementation of the law that criminalizes clients, there had been an increase in violence experienced by sex workers, which was linked to greater risk taking in client selection due to the necessity of rushed negotiation with potential clients.<sup>28 29</sup>

Police undercover operations further reduce the safety of sex workers as initial interactions with clients focus on determining that sex workers are not undercover police officers, rather than allowing time to negotiate the details of the transaction, including condom use, type of service and price. The negative impact of undercover police operations on the safety and health of sex workers is of note as it is one of the main enforcement strategies available to police in a context where clients are criminalized.



1  
2  
3  
4  
5  
6  
7  
8  
9  
10  
11  
12  
13  
14  
15  
16  
17  
18  
19  
20  
21  
22  
23  
24  
25  
26  
27  
28  
29  
30  
31  
32  
33  
34  
35  
36  
37  
38  
39  
40  
41  
42  
43  
44  
45  
46  
47  
48  
49  
50  
51  
52  
53  
54  
55  
56  
57  
58  
59  
60

The results of this study further highlight that in a context where sex buyers are criminalized, sex workers continue to be displaced, as many clients insist on engaging in sex work transactions away from police scrutiny. Being displaced to unknown, secluded, industrial areas where there is little chance of receiving help when needed is linked to increased risk of violence and rape and reduces sex workers' ability to negotiate the transaction on their terms, including condom use and thus puts sex workers at increased risk for physical and sexual violence including HIV/STI infection.<sup>15 17 37 38</sup>

Evidence both in Canada and globally has consistently shown that criminalisation of sex workers prevents sex workers from accessing police protection, whereby police become adversaries as opposed to safety mechanisms.<sup>6 9 10 22 29</sup> A clear example is the case of the detrimentally flawed police investigation of the serial murder of the Missing Women in Vancouver; where criminalisation, and historic discrimination by police were found to be a key factors in the putting police in an adversarial relationship with sex workers.<sup>32</sup> In addition to the deeply engrained stigma of sex work and the historic police discrimination of sex workers, our findings indicate that when sex work clients are police enforcement targets, many sex workers remain reluctant to seek police protection. Sex workers worry about disclosing details of how they operate and where they work for fear police may use this information to refine their enforcement strategies that target sex work clients. This study also identified that in a context of continued police enforcement of sex work clients, even conversations with police about safety can have a destabilizing effect, as any police interactions scare away clients and have the potential to rise suspicion a sex worker might be an undercover police officer

1  
2  
3 or a police informant. This deters women from interacting with police and undermined  
4  
5 the main objective of the VPD policing guidelines, which is to prioritize the safety of sex  
6  
7 workers. In addition to scaring away potential clients, and thus potentially reducing the  
8  
9 income women rely upon, being labelled as a police informant can place a woman at the  
10  
11 bottom of street hierarchy and may place her at severe risk for violence.  
12  
13  
14

15  
16 While rhetorically powerful and politically appealing, there is a fundamental  
17  
18 conceptual inconsistency in policies that criminalize clients and purport to prioritize the  
19  
20 safety of sex workers. In its original incarnation, the model of criminalizing clients in  
21  
22 Sweden was not designed to increase the safety of women *in* sex work; rather its goal  
23  
24 was to eradicate prostitution and increase the safety of women who exit sex work.  
25  
26 Indeed, in Sweden, the government explicitly condoned the increased risks that  
27  
28 marginalized sex workers were exposed to by arguing that any adverse effects on  
29  
30 women who remain in sex work were outweighed by the message of the law that  
31  
32 prostitution is not tolerated.<sup>28</sup> Our findings indicate that policies that criminalize clients  
33  
34 are, in practice, not easily reconciled with policies that aim to prioritize the safety of sex  
35  
36 workers, such as outlined in VPD sex work enforcement guidelines. Indeed, the findings  
37  
38 of our study indicate that despite police efforts to prioritize the safety of sex workers,  
39  
40 when clients remain enforcement targets, sex workers continue to be at increased risk  
41  
42 for physical and sexual violence and perceive police concern for their safety as a form of  
43  
44 nuisance and harassment.  
45  
46  
47  
48  
49  
50  
51  
52

53  
54 Street-involved sex workers and those living in poverty have historically been  
55  
56 exposed most directly to the negative effects of restrictive policing and criminalized sex  
57  
58  
59  
60

1  
2  
3 work laws.<sup>14 15 28</sup> Evidence from Sweden indicates that criminalizing clients negatively  
4  
5 affected the working conditions and safety of all segments of sex workers by further  
6  
7 pushing them underground. However, marginalized sex workers who solicit and/or  
8  
9 service on the street were most negatively impacted by the criminalisation of clients, as  
10  
11 they may not have the resources to reduce police scrutiny by advertising online, or be  
12  
13 contacted by phone.<sup>28</sup> Due to a less developed welfare system in Canada, and the larger  
14  
15 population of street-based sex workers compared to Sweden, the negative impact of  
16  
17 demand criminalisation on sex workers health and safety will likely be even more  
18  
19 pronounced in the Canadian context.  
20  
21  
22  
23  
24

25  
26 The very existence of specific laws to regulate sex work speaks to the stigma  
27  
28 associated with sex work and the link between sex work legislation and morality.<sup>39</sup> In  
29  
30 Canada as in most settings globally, there are already laws in place for targeting various  
31  
32 forms of exploitation and nuisance that may arise in the context of sex work, such as  
33  
34 public disturbance, indecent exhibition, coercion, sexual assault, trafficking persons,  
35  
36 extortion, and kidnapping. As such, given the negative impact of criminalized sex work  
37  
38 laws and enforcement practices, our findings lend further support to calls for the full  
39  
40 decriminalisation of sex work in Canada, consistent with international guidelines by  
41  
42 global policy bodies.<sup>1 29</sup>  
43  
44  
45  
46  
47

48  
49 Some regions, most notably New Zealand, have decriminalized sex work. In New  
50  
51 Zealand, work place health and safety standards have been established in consultation  
52  
53 with sex workers, and sex workers can bring employment complaints to governing  
54  
55 bodies.<sup>27</sup> The New Zealand Prostitution Reform Act treats sex work as any other  
56  
57  
58  
59  
60

1  
2  
3 business, regulating its commercial practice through standard employment Health and  
4  
5 Safety regulations; regulating the location of commercial sex establishments through  
6  
7 zoning by-laws; and specifying the health and safety obligations of managers and  
8  
9 workers.<sup>39</sup> Although decriminalisation is by no means a panacea, there is significant  
10  
11 evidence to suggest that, in New Zealand, it has created improved working conditions  
12  
13 for sex workers, including increased ability to report violence to police.<sup>40</sup> The removal of  
14  
15 criminalized and enforcement-based approaches to sex work will also help to support  
16  
17 access and implementation of other health and social interventions not currently  
18  
19 available to the most criminalized, street-involved sex workers; such as safer indoor  
20  
21 work and housing spaces, integrated health and social welfare supports, substance use  
22  
23 prevention and treatment, and opportunities for alternative income for those sex  
24  
25 workers who chose to exit.  
26  
27  
28  
29  
30  
31  
32

33 This study has several limitations. This study is qualitative in nature and as such,  
34  
35 results may not be generalizable to sex workers in other settings. As well, the lived  
36  
37 experiences of participants represented in this study reflect street-involved sex workers  
38  
39 living in poverty and may not be representative of the experiences of sex workers in  
40  
41 other segments of the industry. However, given that evidence has consistently shown  
42  
43 that criminalisation and policing disproportionately target street-based sex workers, we  
44  
45 feel these narratives provide critical evidence of the health and safety harms of such a  
46  
47 policy. Also, the experiences with police among participants of this study may not be  
48  
49 restricted to sex work related interactions and may, therefore, be influenced by the  
50  
51 wider criminalisation women who live in poverty face, including illicit substance use.  
52  
53  
54  
55  
56  
57  
58  
59  
60

1  
2  
3  
4  
5  
6  
7  
8  
9  
10  
11  
12  
13  
14  
15  
16  
17  
18  
19  
20  
21  
22  
23  
24  
25  
26  
27  
28  
29  
30  
31  
32  
33  
34  
35  
36  
37  
38  
39  
40  
41  
42  
43  
44  
45  
46  
47  
48  
49  
50  
51  
52  
53  
54  
55  
56  
57  
58  
59  
60

In summary, this study suggests that enforcement strategies that target sex work clients reproduce the harms related to criminalized and quasi-criminalized approaches to the regulation of sex work. This empirical research clearly demonstrates that the continued criminalisation and policing of clients, even in a context where sex workers no longer represent police targets, profoundly impacted sex workers' ability to negotiate their working conditions, health and safety, including protections from violence, abuse and HIV/STI infection. Sex workers were displaced to isolated areas with few protections from violence and abuse; were forced to rush or forgo screening clients and negotiating the terms of transactions (e.g. fee, condom use) and agree to clients or sexual services they would otherwise refuse; and were unable to access police protections. The results also highlight the critical role of sex workers lived experiences in any evidence-based policy making in Canada and globally. Two decades of failures of prostitution laws in Canada stemmed from failure of consecutive governments to listen to strong evidence by sex workers, academics and human rights experts that the laws were creating and exacerbating devastating harms to sex workers' safety, health and human rights, including violence, abuse and murder. In sum, this study raises serious questions about legislative approaches that criminalize clients and suggests that 'demand criminalisation' risks reproducing the devastating harms to health safety and human rights created by the criminalisation of sex workers.

## ACKNOWLEDGEMENTS

We thank all the women who contributed their time and expertise to this project, as well as research, community partners, and advisory board members. We wish to acknowledge Peter Vann, Gina Willis and Jennifer Morris for their research and administrative support.

## COMPETING INTERESTS

None

## FUNDING

This research was supported by operating grants from the US National Institutes of Health (R01DA033147) and Canadian Institutes of Health Research. KS is partially supported by US National Institutes of Health (R01DA028648), Canadian Institutes of Health Research and Michael Smith Foundation for Health Research. JM is supported by the British Columbia Ministry of Health and by the US National Institutes of Health (R01DA036307).

## CONTRIBUTORS

KS is the principal investigator and senior author of the study and takes full responsibility for the integrity of the study procedures and data collection, management and analysis. AK, KP, JC, KS conceptualized this study and AK oversaw the field team carrying out the study. AK, CT conducted the interviews. AK, JC conducted the ethnographic observation. AK analyzed the data using Atlas software, wrote the original

1  
2  
3 draft of the article and incorporated feedback from all co-authors. KP, CT, JC, SA DB, TK,  
4  
5  
6 JM, KS provided content expertise and critical feedback on the analyses and  
7  
8  
9 interpretation. All authors read and approved the final draft  
10  
11  
12  
13  
14  
15  
16  
17  
18  
19  
20  
21  
22  
23  
24  
25  
26  
27  
28  
29  
30  
31  
32  
33  
34  
35  
36  
37  
38  
39  
40  
41  
42  
43  
44  
45  
46  
47  
48  
49  
50  
51  
52  
53  
54  
55  
56  
57  
58  
59  
60

For peer review only

## REFERENCES

1. WHO, UNAIDS, UNICEF. *Global HIV/AIDS Response: Epidemic Update and Health Sector Progress towards Universal Access*. Geneva: World Health Organization. 2011.  
[http://whqlibdoc.who.int/publications/2011/9789241502986\\_eng.pdf?ua=](http://whqlibdoc.who.int/publications/2011/9789241502986_eng.pdf?ua=)  
(accessed 7 Feb 2014).
2. Rhodes T, Simic M, Baros S, et al. Police violence and sexual risk among female and transvestite sex workers in Serbia: qualitative study. *BMJ* 2008;337.
3. Simić M, Rhodes T. Violence, dignity and HIV vulnerability: Street sex work in Serbia. *Sociol Health Illn* 2009;31:1-16.
4. Gruskin S, Williams Pierce G, Ferguson L. Realigning government action with public health evidence: the legal and policy environment affecting sex work and HIV in Asia. *Cult Health Sex* 2013:1-16.
5. Platt L, Jolley E, Rhodes T, et al. Factors mediating HIV risk among female sex workers in Europe: a systematic review and ecological analysis. *BMJ Open* 2013;3.
6. Shannon K, Csete J. Violence, condom negotiation, and HIV/STI risk among sex workers. *JAMA* 2010;304:573-74.
7. Platt L, Rhodes T, Judd A, et al. Effects of sex work on the prevalence of syphilis among injection drug users in 3 Russian cities. *Am J Public Health* 2007;97:478.
8. Shannon K, Montaner JG. The politics and policies of HIV prevention in sex work. *The Lancet Infectious Diseases* 2012;12:500.



- 1  
2  
3 9. Okal J, Chersich MF, Tsui S, et al. Sexual and physical violence against female sex  
4  
5 workers in Kenya: a qualitative enquiry. *AIDS Care* 2011;23:612-18.  
6  
7
- 8 10. Shannon K, Kerr T, Allinott S, et al. Social and structural violence and power relations  
9  
10 in mitigating HIV risk of drug-using women in survival sex work. *Soc Sci Med*  
11  
12 2008;66:911-21.  
13  
14
- 15 11. Rekart ML. Sex-work harm reduction. *The Lancet* 2006;366:2123-34.  
16  
17
- 18 12. Sanders T. The risks of street prostitution: Punters, police and protesters. *Urban*  
19  
20 *Studies* 2004;41:1703-17.  
21  
22
- 23 13. Lowman J. Violence and the outlaw status of (street) prostitution in Canada.  
24  
25 *Violence against Women* 2000;6:987-1011.  
26  
27
- 28 14. Sanders T, Campbell R. Designing out vulnerability, building in respect: violence,  
29  
30 safety and sex work policy. *Brit J Sociol* 2007;58:1-19.  
31  
32
- 33 15. Shannon K, Strathdee SA, Shoveller J, et al. Structural and environmental barriers to  
34  
35 condom use negotiation with clients among female sex workers: implications for  
36  
37 HIV-prevention strategies and policy. *Am J Public Health* 2009;99:659-65.  
38  
39
- 40 16. Maher L, Mooney-Somers J, Phlong P, et al. Selling sex in unsafe spaces: sex work  
41  
42 risk environments in Phnom Penh, Cambodia. *Harm Reduct J* 2011;8:30.  
43  
44
- 45 17. Krüsi A, Chettiar J, Ridgway A, et al. Negotiating Safety and Sexual Risk Reduction  
46  
47 With Clients in Unsanctioned Safer Indoor Sex Work Environments: A Qualitative  
48  
49 Study. *Am J Public Health*, 2012:1154-59.  
50  
51  
52  
53  
54  
55  
56  
57  
58  
59  
60

- 1  
2  
3  
4 18. Deering KN, Lyons T, Feng CX, et al. Client Demands for Unsafe Sex: The  
5  
6 Socioeconomic Risk Environment for HIV Among Street and Off-Street Sex  
7  
8 Workers. *JAIDS* 2013;63:522-31.  
9
- 10  
11 19. Shannon K, Kerr T, Strathdee SA, et al. Prevalence and structural correlates of  
12  
13 gender based violence among a prospective cohort of female sex workers. *BMJ*  
14  
15 2009;339.  
16  
17
- 18  
19 20. Lippman SA, Donini A, Diaz J, et al. Social-environmental factors and protective  
20  
21 sexual behavior among sex workers: the Encontros intervention in Brazil. *Am J*  
22  
23 *Public Health* 2010;100:S216-23.  
24  
25
- 26  
27 21. Kerrigan D, Ellen JM, Moreno L, et al. Environmental-structural factors significantly  
28  
29 associated with consistent condom use among female sex workers in the  
30  
31 Dominican Republic. *AIDS* 2003;17:415-23.  
32
- 33  
34 22. Richter ML, Chersich MF, Scorgie F, et al. Sex work and the 2010 FIFA World Cup:  
35  
36 time for public health imperatives to prevail. *Global Health* 2010;6:1.  
37  
38
- 39  
40 23. Lazarus L, Deering KN, Nabess R, et al. Occupational stigma as a primary barrier to  
41  
42 health care for street-based sex workers in Canada. *Cult Health Sex* 2012;14:139-  
43  
44 50.  
45
- 46  
47 24. Boynton P, Cusick L. Sex workers to pay the price: UK plans to cut street prostitution  
48  
49 will threaten sex workers' health. *BMJ* 2006;332:190.  
50
- 51  
52 25. Scorgie F, Nakato D, Harper E, et al. We are despised in the hospitals: sex workers'  
53  
54 experiences of accessing health care in four African countries. *Cult Health Sex*  
55  
56 2013;15:450-65.  
57  
58  
59  
60

- 1  
2  
3  
4 26. Oppenheim M. MEPs vote to criminalise buying sex. *The Guardian* 2014 26 February  
5  
6 2014.  
7  
8  
9 27. Goodyear M, Weitzer R. International trends in the control of sexual services.  
10  
11 *Policing pleasure: Sex work, policy and the state in globalperspective, ed. S.*  
12  
13 *Dewey and P. Kelly* 2011:16-30.  
14  
15  
16 28. Scoular J. Criminalizing 'punters': evaluating the Swedish position on prostitution.  
17  
18 *Journal of Social Welfare and Family Law* 2004;26:195-210.  
19  
20  
21 29. Global Commission on HIV and the Law. *HIV and the Law: Risks, Rights, & Health.*  
22  
23 2012. [http://www.undp.org/content/dam/undp/library/HIV-AIDS/Governance of](http://www.undp.org/content/dam/undp/library/HIV-AIDS/Governance%20of%20HIV%20Responses/Commissions%20report%20final-EN.pdf)  
24  
25 [HIV Responses/Commissions report final-EN.pdf](http://www.undp.org/content/dam/undp/library/HIV-AIDS/Governance%20of%20HIV%20Responses/Commissions%20report%20final-EN.pdf) (accessed 4 Feb 2014)  
26  
27  
28 30. Canada Supreme Court. *Decision, Canada (Attorney General) vs. Bedford, Ottawa:*  
29  
30 Supreme Court of Canada; 2013. [http://scc-csc.lexum.com/decisia-scc-csc/scc-](http://scc-csc.lexum.com/decisia-scc-csc/scc-csc/scc-csc/en/item/13389/index.do)  
31  
32 [csc/scc-csc/en/item/13389/index.do](http://scc-csc.lexum.com/decisia-scc-csc/scc-csc/scc-csc/en/item/13389/index.do) (accessed 3 Feb 2014)  
33  
34  
35 31. Crawford A. Peter MacKay faces balancing act with justice agenda, court rulings.  
36  
37 *Canadian Broadcasting Corporatio.* January 27 2014.  
38  
39 [http://www.cbc.ca/news/politics/peter-mackay-faces-balancing-act-with-justice-](http://www.cbc.ca/news/politics/peter-mackay-faces-balancing-act-with-justice-agenda-court-rulings-1.2511220)  
40  
41 [agenda-court-rulings-1.2511220](http://www.cbc.ca/news/politics/peter-mackay-faces-balancing-act-with-justice-agenda-court-rulings-1.2511220) (accessed 2 Mar 2014)  
42  
43  
44 32. Oppal W. Forsaken: The Report on the Missing and Murdered Women Commission  
45  
46 of Inquiry. British Columbia, 2012.  
47  
48 [http://www.ag.gov.bc.ca/public\\_inquiries/docs/Forsaken-ES.pdf](http://www.ag.gov.bc.ca/public_inquiries/docs/Forsaken-ES.pdf) (accessed 3  
49  
50 Mar 2014).  
51  
52  
53  
54  
55  
56  
57  
58  
59  
60

- 1  
2  
3  
4 33. Vancouver Police Department. Sex work enforcement guidelines, 2013.  
5  
6 [http://vancouver.ca/police/assets/pdf/reports-policies/sex-enforcement-](http://vancouver.ca/police/assets/pdf/reports-policies/sex-enforcement-guidelines.pdf)  
7  
8 [guidelines.pdf](http://vancouver.ca/police/assets/pdf/reports-policies/sex-enforcement-guidelines.pdf) (accessed 7 Jan 2014).  
9  
10  
11 34. Vancouver Police Department. *Counter Exploitation Unit*.  
12  
13 [http://vancouver.ca/police/organization/investigation/investigative-](http://vancouver.ca/police/organization/investigation/investigative-services/special-investigation/vice.html)  
14  
15 [services/special-investigation/vice.html](http://vancouver.ca/police/organization/investigation/investigative-services/special-investigation/vice.html) (accessed 7 Jan 2014).  
16  
17  
18 35. Shannon K, Bright V, Allinott S, et al. Community-based HIV prevention research  
19 among substance-using women in survival sex work: The Maka Project  
20 Partnership. *Harm Reduct J* 2007;4:20.  
21  
22  
23  
24  
25  
26 36. Vancouver Police Department. *Statistical Reports by District and City totals*.  
27  
28 <https://vancouver.ca/police/Planning/StatsDistrict/2013/2012-2013YTD.pdf>  
29  
30 (accessed 7 Jan 2014).  
31  
32  
33 37. Decker MR, McCauley HL, Phuengsamran D, et al. Violence victimisation, sexual risk  
34 and sexually transmitted infection symptoms among female sex workers in  
35 Thailand. *Sex Transm Infect* 2010;86:236-40.  
36  
37  
38  
39  
40  
41 38. Decker MR, Wirtz AL, Baral SD, et al. Injection drug use, sexual risk, violence and  
42 STI/HIV among Moscow female sex workers. *Sex Transm Infect* 2012;88:278-83.  
43  
44  
45  
46 39. Bruckert C, Hannem S. Rethinking the Prostitution Debates: Transcending Structural  
47 Stigma in Systemic Responses to Sex Work. *Canadian Journal of Law and Society*  
48 2013;28:43-63.  
49  
50  
51  
52  
53 40. Abel G, Fitzgerald L, Brunton C. The impact of decriminalisation on the number of  
54 sex workers in New Zealand. *J Soc Policy* 2009;38:515-31.  
55  
56  
57  
58  
59  
60

1  
2  
3  
4  
5  
6  
7  
8  
9  
10  
11  
12  
13  
14  
15  
16  
17  
18  
19  
20  
21  
22  
23  
24  
25  
26  
27  
28  
29  
30  
31  
32  
33  
34  
35  
36  
37  
38  
39  
40  
41  
42  
43  
44  
45  
46  
47  
48  
49  
50  
51  
52  
53  
54  
55  
56  
57  
58  
59  
60

For peer review only

**Supplementary Materials:****Table: Criminalisation and legislative approaches to sex work**

**Criminalisation:** Selling and purchasing sexual services is illegal. Examples include: most parts of the US (except Nevada), large parts of Eastern Europe including Russia, large parts of Asia, including China and large parts of Africa including Uganda.

**Quasi-Criminalisation:** Selling and purchasing sexual services is not illegal but most surrounding activities are. This includes the prohibition of communicating for prostitution, living off the avails of prostitution, keeping a brothel and soliciting sexual transactions in public spaces. Examples include Canada, UK.

**Demand Criminalisation:** The purchase of sexual services is illegal while selling sex is not illegal. Demand criminalisation was first implemented in Sweden in 1999. The primary objective of this approach is to eradicate prostitution by eliminating demand. However, evidence from Sweden, indicates that the law has been unsuccessful in meeting this objective. Examples include: Sweden, Norway, Iceland, and France.

**Legalization:** Sex work is permitted under certain state-specified conditions such as in licensed brothels or sex work zones and heavily regulated through targeted regulations of sex work businesses (e.g. often highly punitive; compulsory registration or mandatory health checks) generally in the absence of labour rights. This legal approach includes, brothels in Nevada, USA, and sex work zones in the Netherland.

**Decriminalisation:** The removal of all laws that criminalize sex work. Sex work is subject to the same regulations, licensing and zoning as other businesses. Sex workers have the same labour protections as employees in other sectors, e.g. workplace health and safety standards. In case of violence or theft, the standard Criminal code applies. Examples include New Zealand and New South Wales, Australia.

# BMJ Open

## CRIMINALISATION OF CLIENTS: REPRODUCING VULNERABILITIES FOR VIOLENCE AND POOR HEALTH AMONG STREET-BASED SEX WORKERS IN CANADA A QUALITATIVE STUDY

|                                 |                                                                                                                                                                                                                                                                                                                                                                                                                                                                                                                                                                                                                                                                                                               |
|---------------------------------|---------------------------------------------------------------------------------------------------------------------------------------------------------------------------------------------------------------------------------------------------------------------------------------------------------------------------------------------------------------------------------------------------------------------------------------------------------------------------------------------------------------------------------------------------------------------------------------------------------------------------------------------------------------------------------------------------------------|
| Journal:                        | <i>BMJ Open</i>                                                                                                                                                                                                                                                                                                                                                                                                                                                                                                                                                                                                                                                                                               |
| Manuscript ID:                  | bmjopen-2014-005191.R1                                                                                                                                                                                                                                                                                                                                                                                                                                                                                                                                                                                                                                                                                        |
| Article Type:                   | Research                                                                                                                                                                                                                                                                                                                                                                                                                                                                                                                                                                                                                                                                                                      |
| Date Submitted by the Author:   | 04-May-2014                                                                                                                                                                                                                                                                                                                                                                                                                                                                                                                                                                                                                                                                                                   |
| Complete List of Authors:       | Krüsi, Andrea; BC Centre for Excellence in HIV/AIDS, Pacey, Katrina; Pivot Legal Society, Bird, Lorna; Sex Workers United Against Violence, Taylor, Christina; BC Centre for Excellence in HIV/AIDS, Chettiar, Jill; BC Centre for Excellence in HIV/AIDS, Allan, Sarah; BC Centre for Excellence in HIV/AIDS, Bennett, Darcie; Pivot Legal Society, Montaner, Julio; BC Centre for Excellence in HIV/AIDS, ; University of British Columbia, Department of Medicine Kerr, Thomas; British Columbia Centre for Excellence in HIV/AIDS, ; University of British Columbia, Department of Medicine Shannon, Kate; BC Centre for Excellence in HIV/AIDS, ; University of British Columbia, Department of Medicine |
| <b>Primary Subject Heading</b>: | Qualitative research                                                                                                                                                                                                                                                                                                                                                                                                                                                                                                                                                                                                                                                                                          |
| Secondary Subject Heading:      | Sexual health, HIV/AIDS, Public health                                                                                                                                                                                                                                                                                                                                                                                                                                                                                                                                                                                                                                                                        |
| Keywords:                       | Sex work, Violence, Sexual Health, HIV/AIDS, Law                                                                                                                                                                                                                                                                                                                                                                                                                                                                                                                                                                                                                                                              |
|                                 |                                                                                                                                                                                                                                                                                                                                                                                                                                                                                                                                                                                                                                                                                                               |

SCHOLARONE™  
Manuscripts

1  
2  
3  
4 CRIMINALISATION OF CLIENTS: REPRODUCING VULNERABILITIES FOR  
5 VIOLENCE AND POOR HEALTH AMONG STREET-BASED SEX WORKERS  
6  
7  
8 IN CANADA  
9  
10 A QUALITATIVE STUDY  
11

12  
13  
14 A Krüsi,<sup>1</sup> K Pacey,<sup>2</sup> L Bird,<sup>3</sup> C Taylor,<sup>1</sup> J Chettiar,<sup>1,3</sup> S Allan,<sup>1</sup> D Bennett,<sup>2</sup>

15  
16 JS Montaner,<sup>1,4</sup> T Kerr,<sup>1,2</sup> K Shannon<sup>1,4</sup>  
17  
18  
19

- 20  
21 1. Gender and Sexual Health Initiative, British Columbia Centre for Excellence in  
22 HIV/AIDS, St. Paul's Hospital, 608-1081 Burrard Street, Vancouver, BC,  
23 CANADA, V6Z 1Y6  
24  
25 2. Pivot Legal Society, 121 Heatley Avenue, Vancouver, CANADA, V6A 3E9  
26  
27 3. Sex Workers United Against Violence, Vancouver, CANADA  
28  
29 4. Department of Medicine, University of British Columbia, St. Paul's Hospital,  
30 608-1081 Burrard Street, Vancouver, BC, CANADA, V6Z 1Y6  
31  
32  
33  
34  
35

36 **Send correspondence to:**

37 **Kate Shannon**, PhD, MPH  
38 Associate Professor, Department of Medicine  
39 University of British Columbia  
40 Director, Gender and Sexual Health Initiative  
41 B.C. Centre for Excellence in HIV/AIDS  
42 St. Paul's Hospital, 608-1081 Burrard Street,  
43 Vancouver, B.C., V6Z 1Y6, Canada  
44 **Tel:** (604) 804-9459  
45 **Fax:** (604) 806-9044  
46 **Email:** [gshi@cfenet.ubc.ca](mailto:gshi@cfenet.ubc.ca)  
47  
48  
49  
50  
51

52 **Keywords:** sex work, violence, HIV/AIDS, sexual health, criminalisation

53 **Word Count:** 5967

54 **Tables:** 4

55 **Figures:** 1  
56  
57  
58  
59  
60



## ABSTRACT

**Objectives:** To explore how criminalisation and policing of sex buyers (clients) rather than sex workers, shapes sex workers' working conditions and sexual transactions including risk of violence and HIV/STI infections.

**Design:** Qualitative and ethnographic study triangulated with sex work-related violence prevalence data and publicly available police statistics.

**Setting:** Vancouver, Canada provides a unique opportunity to evaluate the impact of policies that criminalize clients as the local police department adopted a sex work enforcement policy in January 2013 that prioritize sex workers' safety over arrest, while continuing to target clients.

**Participants:** 26 cisgender and 5 transgender women street-based sex workers (n=31) participated in semi-structured interviews about their working conditions. All had exchanged sex for money in the previous 30 days in Vancouver.

**Outcome measures:** Thematic analysis of interview transcripts and ethnographic field notes focused on how police enforcement of clients shaped sex workers' working conditions and sexual transactions, including risk of violence and HIV/STI infections, over an 11 month period post-policy implementation (January-November 2013).

**Results:** Sex workers' narratives and ethnographic observations indicated that while police sustained a high level of visibility they eased charging or arresting sex workers and showed increased concern for their safety. However, participants' accounts and police statistics indicated continued police enforcement of clients. This profoundly impacted the safety strategies sex workers employed. Sex workers continued to mistrust police, had to rush screening clients, and were displaced to outlying areas with increased risks of violence, including being forced to engage in unprotected sex.

**Conclusions:** These findings suggest that criminalisation and policing strategies that target clients reproduce the harms, created by the criminalisation of sex work, in particular, vulnerability to violence and HIV/STI infection. The current findings support decriminalisation of sex work to ensure work conditions that support the health and safety of sex workers in Canada and globally.

300/300

**Strengths and limitations of this study:**

- This is the first empirical study of how criminalisation and policing of sex buyers shapes sex workers' risks for violence and poor health, outside of a small body of research in Scandinavia
- This study draws on data of the lived experiences of sex workers from 31 qualitative interviews triangulated with ethnographic observations, sex work-related violence prevalence data and publicly available police statistics.
- The data represented in this study reflect the experiences of primarily street-based sex workers, disproportionately impacted by policing and thus, may not be representative of other segments of the sex industry
- This study is a qualitative evaluation post-implementation of a new enforcement policy targeting sex buyers, rather than sex workers, and as such, likely underestimates the full impact of any legislative change to criminalize the purchasing of sex

## INTRODUCTION

**“Harassing the clients is exactly the same as harassing the women. You harass the clients and you are in exactly the same spot you were before. I’m staying on the streets. I’m in jeopardy of getting raped, hurt.”**

**- Jasmine, Cisgender Women Sex Worker**

There is now a well-established body of epidemiological and social science research globally pointing to the negative impact of legislation and policies that criminalize sex work on violence and other health risks including HIV/STI infection among sex workers.<sup>1-7</sup> The criminalisation of some or all aspects of prostitution remains the dominant legal approach globally,<sup>1 4</sup> despite growing empirical evidence and clear international guidelines by the World Health Organization, UNAIDS, UNDP, and UNFPA calling for full decriminalisation of sex work as necessary to promoting the health and human rights of sex workers. (see Supplementary materials for a summary of legal and regulatory responses to sex work)

Enforcement-based approaches and policing within criminalized frameworks have consistently been linked to elevated risks for violence, and reduced ability to negotiate safer sex transactions, including prevention of HIV and other sexually transmitted infections (STIs).<sup>1-3 6 8</sup> Previous research indicates that in criminalized settings, policing strategies can range from surveillance and crackdowns to arrests or threats of arrest, intimidation by police, and police violence can be frequent and go largely unreported.<sup>2 9-12</sup> These risks are amplified for the most marginalized and visible sex workers, those living in poverty and working on the street.<sup>10 13 14</sup> In an effort to avoid police, sex workers often move to outlying secluded areas to meet and service clients where there are few to no protections from violence and abuse, and reduced

1  
2  
3 ability to refuse unwanted clients or services, including client demands for sex without a  
4  
5 condom.<sup>9 10 15-17</sup> Criminalisation and policing force sex workers to rush or forgo  
6  
7 screening prospective clients or negotiating the terms of sexual transactions before  
8  
9 entering a vehicle, placing sex workers at increased risk of physical violence, rape and  
10  
11 HIV/STI infection.<sup>9 18 19</sup> Criminalisation of sex work also impedes access to safer indoor  
12  
13 work environments, particularly for those most socially and economically marginalized.  
14  
15 Previous research undertaken in Canada and internationally has indicated that indoor  
16  
17 sex work environments with structural supports including supportive management  
18  
19 policies, security measures, and access to HIV/STI prevention resources, increase sex  
20  
21 workers' control over sexual transactions with clients, including protections from  
22  
23 violence, abuse, and HIV/STI infections and promote sex workers ability to access police  
24  
25 protections in cases of violence.<sup>17 20 21</sup>

26  
27  
28  
29  
30  
31  
32  
33 The criminalisation of sex work has also been found to prevent sex workers from  
34  
35 reporting violent perpetrators and seeking legal recourse after physical or sexual  
36  
37 assault.<sup>9 22</sup> There is also growing evidence that legislation criminalizing sex work  
38  
39 constitutes a significant barrier to accessing health care services, including primary care,  
40  
41 HIV treatment and prevention, and sexual health services.<sup>16 23 24</sup> Additionally, stigma  
42  
43 and discrimination against sex workers are significantly amplified in settings where sex  
44  
45 work is criminalized, and further reduce sex workers ability to access police protections  
46  
47 or health and social support services.<sup>23 25</sup>

### **'Demand Criminalisation'**

Over the past decade there has been increased interest by a number of higher income countries to attempt to eradicate prostitution through 'demand criminalisation', which criminalizes the purchase, but not the selling, of sexual services. Sweden, Norway, Iceland, and most recently France, opted for 'demand criminalisation', despite the lack of evidence supporting this legal framework. Similarly, the European Union has also recently voted in favour of implementing this approach.<sup>26</sup> 'Demand criminalisation' was first implemented in Sweden in 1999. The primary objective of the law is to eradicate prostitution by eliminating demand. However, evidence from Sweden, indicates that the law has been unsuccessful in meeting this objective.<sup>27</sup> Instead, a number of unintended consequences have been reported – namely, that it drives sex workers and clients underground to more clandestine locales, and is difficult to enforce due to the unwillingness of sex workers to testify against their clients.<sup>28 29</sup>

### **The Canadian Context**

Canada is at a critical time in the evolution of its legal response to sex work. In December 2013, Canada's highest court, the Supreme Court of Canada, unanimously struck down Canada's core prostitution laws, deeming them unconstitutional for violating sex workers' constitutional rights, including the ability to protect themselves from violence, abuse and HIV/STI infection.<sup>30</sup> The three laws struck down included prohibitions on communicating in public for the purpose of prostitution (sex workers or clients), operating a bawdy house, and living off the avails of prostitution. Similar to the United Kingdom and other commonwealth countries, the Canadian Criminal Code has

1  
2  
3 never criminalized the buying or selling of sex *per se*, however the laws prohibit virtually  
4  
5 every other aspect of sex work, making it effectively impossible to engage in sex work  
6  
7 legally. The hypocrisy of the criminalized prostitution laws and the unintended harms on  
8  
9 sex workers' safety, health, and human rights were a critical reason for the Supreme  
10  
11 Court of Canada decision.<sup>30</sup> The Court suspended the decision for one year to provide  
12  
13 the Canadian government time to respond; by either removing the struck down laws  
14  
15 from the Criminal Code (and thus decriminalize sex work); or bringing the laws  
16  
17 governing prostitution in line with the decision. Following the decision, the Canadian  
18  
19 government has moved quickly towards calling for criminalizing the purchase of sex,<sup>31</sup>  
20  
21 despite a lack of evidence that this change would address the harms associated with  
22  
23 criminalized and quasi-criminalized approaches of regulating prostitution.  
24  
25  
26  
27  
28  
29

### 30 31 **New Sex Work Enforcement Policy in Vancouver, Canada**

32  
33 Vancouver, Canada provides a unique opportunity to evaluate the potential  
34  
35 impact of laws and policies that criminalize sex buyers (clients). In January 2013, the  
36  
37 Vancouver Police Department (VPD) officially adopted new sex work enforcement  
38  
39 guidelines that shifted the focus in policing sex work away from arresting or pressing  
40  
41 charges against sex workers. These sex work enforcement guidelines emerged after two  
42  
43 decades of tremendous violence and murder of street-based sex workers and strong  
44  
45 pressure from sex work and other community organizations, legal experts, and  
46  
47 academic researchers calling for reforms to local policing practices to better protect,  
48  
49 rather than increase harm, isolation and risk of violence to sex workers.<sup>32</sup> The sex work  
50  
51 policing guidelines set out a strategy to 'open communication' with sex workers and  
52  
53  
54  
55  
56  
57  
58  
59  
60

1  
2  
3 prevent violence against sex workers through prioritizing their safety over enforcement  
4  
5 measures such as arrest.<sup>33</sup> However, the policing guidelines did not address changes in  
6  
7 enforcement of clients. In fact, on their website the VPD confirms that they continue to  
8  
9 “target both pimps and customers, in locations where the impact of the sex trade has  
10  
11 become unacceptable”.<sup>34</sup> The result is that as of January 2013, Vancouver has been a  
12  
13 de facto ‘demand criminalisation’ environment.  
14  
15  
16  
17

18  
19 Therefore, the objectives of this study are to evaluate how a new local  
20  
21 enforcement strategy that targets clients, but not sex workers, shape sex workers’  
22  
23 interactions with police and negotiation of their working conditions and sexual  
24  
25 transactions with clients, with a particular focus on protections from violence and  
26  
27 HIV/STI infections.  
28  
29

## 30 31 **METHODS**

32  
33 This study is situated within a larger NIH-funded longitudinal qualitative and  
34  
35 ethnographic research project investigating the structural and physical, social and policy  
36  
37 features of work environments shaping sex workers’ sexual health, violence, and access  
38  
39 to care in Vancouver, Canada. The research builds on longstanding partnerships and a  
40  
41 community advisory board with sex worker, community, policy and health stakeholders  
42  
43 since 2004, and runs alongside a sister project known as AESHA (An Evaluation of Sex  
44  
45 Workers’ Health Access). The AESHA cohort is a community-based longitudinal study of  
46  
47 over 800 sex workers with bi-annual follow-up, focused on evaluating the physical,  
48  
49 social and policy environments shaping sexual health, violence, HIV vulnerability and  
50  
51  
52  
53  
54  
55  
56  
57  
58  
59  
60

1  
2  
3 access to care among sex workers.<sup>35</sup> The research and outreach team include both  
4  
5 experiential and non-experiential staff.  
6  
7

8 This study draws on ethnographic field work of street-based sex work scenes and  
9  
10 qualitative semi-structured interviews with street-involved sex workers about their  
11  
12 working conditions, interactions with police, and negotiations of health and safety with  
13  
14 clients, in the City of Vancouver, Canada over 11 months (January-November 2013),  
15  
16 following the implementation of the new sex work enforcement guidelines by the  
17  
18 Vancouver Police Department (VPD) in January 2013. Qualitative and ethnographic data  
19  
20 were triangulated with sex work-related violence prevalence data from the AESHA  
21  
22 cohort pre and post policy implementation and publicly available police statistics that  
23  
24 report on prostitution related criminal code offences in the City of Vancouver.<sup>36</sup>  
25  
26  
27  
28  
29  
30

31 The lead author (AK) and co-author (JC) conducted more than 40 hours of  
32  
33 ethnographic observation within known street-based sex work strolls in the City of  
34  
35 Vancouver to assess level of police presence; shifts in working areas; and police, sex  
36  
37 worker and client interactions. All ethnographic observations were conducted within the  
38  
39 context of regular weekly AESHA outreach shifts, which included provision of harm  
40  
41 reduction supplies, food and referrals to social and health supports. Observation  
42  
43 sessions lasted three to five hours and took place during peak hours of sex work activity  
44  
45 between 10pm and 3am. AK and JC recorded brief fieldnotes in a research log during  
46  
47 the observation sessions and elaborated on them after each observation outing.  
48  
49  
50  
51  
52

53 Interview participants were recruited through purposive sampling from the  
54  
55 longitudinal cohort (AESHA), and aimed to reflect variation in demographics (e.g., age,  
56  
57  
58  
59  
60



1  
2  
3 ethnicity, gender) and work environments (e.g., geographic neighbourhoods; variation  
4 in street and off-street solicitation and transaction spaces). Eligibility criteria for the in-  
5  
6 depth interviews included: 1) current sex work defined as exchanged sex for money in  
7  
8 the last 30 days in City of Vancouver; 2) identifying as cis- or transgender women and 3)  
9  
10 aged 18 years or older. While the larger qualitative and ethnographic research and  
11  
12 AESHA projects focus on a diversity of street and off-street (e.g., indoor, online) sex  
13  
14 work environments, this specific study aimed to examine the experiences of street-  
15  
16 involved sex workers (i.e., those soliciting and/or servicing on the street) given  
17  
18 substantial data that criminalisation and enforcement disproportionately target this  
19  
20 segment of the sex industry.<sup>10 13 14</sup> It should be noted that even within this context,  
21  
22 many street-involved sex workers worked in both street and off-street venues, including  
23  
24 online and indoor informal and formal venues (see results).  
25  
26  
27  
28  
29  
30  
31  
32

33  
34 The 31 semi-structured interviews were conducted by two experienced  
35  
36 qualitative interviewers (CT, AK) and facilitated by an interview guide encouraging broad  
37  
38 discussions of working conditions, police presence and interactions, and negotiation of  
39  
40 health and safety in transactions with clients, post-VPD policy implementation (January  
41  
42 2013). The interview guide was developed based on existing knowledge of the research  
43  
44 team and in collaboration with our sex worker, community and policy partners. We  
45  
46 conducted all interviews at one of two field offices in the City of Vancouver. Interviews  
47  
48 lasted between 45 and 90 minutes, were audio-recorded, transcribed verbatim and  
49  
50 checked for accuracy. All participants provided informed consent and were  
51  
52 remunerated with a CAD \$30 honorarium for their time, expertise and travel. The study  
53  
54  
55  
56  
57  
58  
59  
60

1  
2  
3 holds ethical approval by the Providence Healthcare/University of British of Colombia  
4  
5  
6 Research Ethics Board.  
7

8  
9 Interview transcripts and ethnographic data were analyzed using thematic  
10  
11 analyses to examine sex worker's interactions with police and negotiation of their  
12  
13 working conditions and sexual transactions with clients, including protections from  
14  
15 violence, abuse, and HIV/STI infections, post-policy implementation. All textual data  
16  
17 were analyzed using an inductive and iterative process facilitated by the qualitative  
18  
19 analysis software ATLAS.TI V7. The initial coding framework was based on key themes  
20  
21 reflected in the interview guide, participants' accounts and fieldnotes. More  
22  
23 conceptually-driven substantive codes (e.g., trust, discrimination, control over sex work  
24  
25 transactions) were then applied. Verbatim narratives are reported using pseudonyms  
26  
27 assumed by sex workers to ensure anonymity. Longitudinal quantitative data on  
28  
29 prevalence of workplace physical and sexual violence among sex workers from the  
30  
31 AESHA cohort were analyzed by two 8month time-periods (pre-policy, May 1- December  
32  
33 31, 2012; vs. post-policy implementation, January 1-August 31, 2013). Analysis was  
34  
35 conducted using SAS statistical software version 9.2 and restricted to sex workers in  
36  
37 AESHA who solicited and/or serviced clients on the street. Descriptive frequencies and  
38  
39 bivariate analyses were analyzed to test for statistical significance by time period of VPD  
40  
41 policy implementation (pre vs. post) and reported using odds ratios (OR), 95%  
42  
43 confidence intervals (CIs) and p-values.  
44  
45  
46  
47  
48  
49  
50  
51  
52  
53  
54  
55  
56  
57  
58  
59  
60

## RESULTS:

### Sample characteristics

The sample for semi-structured interviews included 26 cisgender and 5 transgender women sex workers (total n=31). The mean age of participants was 38 years (range: 24-53). Overall, 21 identified as Caucasian, 8 were of Aboriginal ancestry and 2 participants were of other visible minorities. All participants had experience with street solicitation. The majority (77%, n= 24) reported street solicitation as their primary way of connecting with clients, while others (23%, n= 7) primarily used phone/text solicitation to connect with clients. Just over half (55%, n= 17) primarily serviced clients in vehicles or outdoor public spaces, while 45% (n= 14) primary serviced clients in informal indoor venues (e.g., hotels, client's place, or their home).

### Sex Workers' Experiences with New Sex Work Enforcement Guidelines

Sex workers' narratives and ethnographic observations indicated that while police sustained a high level of visibility they eased charging or arresting sex workers and showed increased concern for their safety. Most sex workers experienced a gradual change in policing over a number of years rather than an abrupt change in policing with the publication of new sex work enforcement policy in January 2013. Some women felt that they were interacting less with police as long as they solicit clients in two separate areas of the city that function as de facto sex work tolerance zones.

*There's more [police] presence. There's not very many more interactions. Before the interactions were always there. They'd come and pull you right outta car and, like push you over. They'd get away with it back then. You know. But now it's like they don't, interact.* - Anna, Transgender woman sex worker

1  
2  
3  
4 The vast majority of participants, regardless of gender, ethnicity and primary place  
5 of solicitation, reported that their interactions with police when soliciting sex work  
6 clients are more positive and generally focus on their safety.  
7  
8  
9

10  
11  
12  
13 *Every time they pull you over it's strictly to ask you how you're doing, how*  
14 *things are. If there's any bad dates you want to report.* Fiona, Cisgender  
15 woman sex worker  
16

17  
18  
19 While participants in this study viewed this change as positive, the continued police  
20 enforcement of clients severely limited any positive impact of this change on their  
21 overall working conditions, risks for violence, abuse, or negotiation of sexual risk  
22 reduction with clients.  
23  
24  
25  
26  
27

### 28 29 **Continued Police Enforcement of Sex Buyers (Clients)**

30  
31  
32 Sex workers' narratives indicated that while police tolerated sex work related  
33 activities in two separate de facto sex work zones, clients continued to be at risk of  
34 police scrutiny. Indeed, according to official police statistics sex work-related Criminal  
35 Code offences rose from an all time low of 47 in 2012 to 71 in 2013 (see Figure1).<sup>36</sup> This  
36 represents a 51 percent increase in prostitution-related offences since the  
37 announcement of the VPD sex work enforcement guidelines in January 2013.  
38  
39  
40  
41  
42  
43  
44  
45  
46  
47  
48  
49  
50  
51

52 Unfortunately, no statistics are available regarding the proportion of sex workers  
53 versus clients who were charged. However, participants' accounts indicate that the 51  
54 percent rise in prostitution related offences likely reflects an increase of enforcement  
55  
56  
57  
58  
59  
60

1  
2  
3 efforts targeting clients, as the majority of sex workers felt that their clients were  
4  
5 currently the main targets of police (consistent with messaging on the VPD website)<sup>34</sup>.  
6  
7

8  
9 *I think the Johns or clients that I have probably worry the most about police.*  
10  
11 - Melissa, Cisgender woman sex worker

12  
13 [Clients] *do get stopped. A couple of my regulars they've been chased off the*  
14 *street, they're not allowed to come downtown anymore. Down here they're*  
15 *bad for that. I guess, it's more so not the girls they go after - it's the guys.*  
16  
17 - Maria, Cisgender woman sex worker

18  
19 Most sex workers reported that clients are at risk of being pulled over by police  
20  
21 even before actually negotiating a sex work transaction by circling around known sex  
22  
23 work areas. However, sex workers' narratives indicated that the riskiest time for  
24  
25 attracting police attention was the moment when women entered the vehicle of a  
26  
27 prospective client. In some cases, police used non-prostitution related charges (e.g.  
28  
29 trafficking violations) as a means to pull over the vehicle and target clients. Women  
30  
31 expressed that while they used to be the main target of police, the more recent  
32  
33 experiences generally ended with the police allowing sex workers to leave, often  
34  
35 without checking for outstanding warrants. Clients were being detained by police, and  
36  
37 issued either a warning or a fine.  
38  
39  
40  
41  
42  
43  
44

45  
46 *Right now when they [police] pull you over they let you, the girl go, keep the*  
47 *guy. Before they would separate you and then make a big investigation. Try*  
48 *to catch you in lies or intimidate you and make you nervous and try to say*  
49 *you can get more charges. – Ruth, Transgender woman sex worker*  
50

51  
52 *One of my regulars, they gave him a five-hundred dollar disturbing the peace*  
53 *ticket. And they didn't run my name through. They just come out of nowhere,*  
54 *right? [Yeah, was it just for you getting in the car?] Yeah, I guess that was*  
55 *just the punishment, you know what I mean? So, I saw the guy a few times*  
56 *afterwards and he was saying he was going to fight and wanted me to be a*  
57  
58  
59  
60

1  
2  
3  
4  
5  
6  
7  
8  
9  
10  
11  
12  
13  
14  
15  
16  
17  
18  
19  
20  
21  
22  
23  
24  
25  
26  
27  
28  
29  
30  
31  
32  
33  
34  
35  
36  
37  
38  
39  
40  
41  
42  
43  
44  
45  
46  
47  
48  
49  
50  
51  
52  
53  
54  
55  
56  
57  
58  
59  
60

*witness and then I guess he thought afterwards, geez no. He told me he paid it online, I guess he has a family and that and he just wanted it to go away.*

- Jessica, Cisgender woman sex worker

### **Criminalisation of Clients: Limited Effect on Deterrence of Sex Work**

Sex workers reported that when police target clients, some clients are deterred from purchasing sex on the street.

*No one will pull over if there's a car, a police car near you. It's, like, if they see the lights they'll disappear. You can see the difference in traffic. They're just gone.* – Selina, Transgender woman sex worker

Some sex workers, however, felt that rather than preventing clients from purchasing sex, police presence resulted in potential clients seeking out sex workers in a different area of the city.

*Once the guy that's looking for a woman sees a cop, in the neighbourhood, he's scared. So he'll go to another neighbourhood and find another woman somewhere.* –Rebecca, Cisgender woman sex worker

For participants in this study, the reality of living in poverty, and marginalization often combined with illicit substance use, meant that even when police target clients, sex workers report that they continue to work for the obvious reason of earning an income. Ethnographic observation and sex worker narratives indicated that police enforcement of clients had no effect on deterring women from engaging in street-based sex work (Table 1). Indeed, for many participants the enforcement of clients forced them to spend longer hours on the street to earn an income. Thus contrary to the objectives of criminalising clients, impeding sex workers ability to engage with potential clients did not result in less street-based sex work for these women. Instead, having access to fewer clients meant it

1  
2  
3 was harder to earn an income and forced sex workers to accept clients or services  
4  
5 (e.g. sex without a condom) that they would otherwise reject due to safety  
6  
7 concerns, this directly increased risks for physical and sexual violence and poor  
8  
9 health, including HIV/STI infection.  
10  
11  
12  
13  
14  
15  
16  
17  
18  
19  
20  
21  
22  
23  
24  
25  
26  
27  
28  
29  
30  
31  
32

33  
34  
35  
36  
37  
38  
39  
40  
41  
42  
43  
44  
45  
46  
47  
48  
49  
50  
51  
52  
53  
54  
55  
56  
57  
58  
59  
60

**Table 1: Criminalisation of Clients: Limited Effect on Deterrence of Sex Work  
Sex Worker Voices**

*While they're going around chasing johns away from pulling up beside you, I have to stay out for longer [...] Whereas if we weren't harassed we would be able to be more choosy as to where we get in, who we get in with you know what I mean? Because of being so cold and being harassed I got into a car where I normally wouldn't have. The guy didn't look at my face right away. And I just hopped in cause I was cold and tired of standing out there. And you know, he put something to my throat. And I had to do it for nothing. Whereas I woulda made sure he looked at me, if I hadn't been waiting out there so long. – Violet, Cisgender woman sex worker*

*It pisses me off that they [the police] are there because basically what it comes down to is the shortest time that I'm out there, the shorter I'm on the street and the better I'm paid. But you [police] stand out there and you fuck up my business and scare away my dates. The longer I'm out there my chances of getting sick, raped, robbed, beat up whatever are greater so. Lisa, Cisgender woman sex worker*

*Of course, 'cause no one's [clients] going to stop with them there. I'm not going to go home. So they're [police] not really doing anything, they're just keeping me out there longer. Really, if they would just leave me alone, I'd get a date and go home*

1  
2  
3  
4  
5  
6  
7  
8  
9  
10  
11  
12  
13  
14  
15  
16  
17  
18  
19  
20  
21  
22  
23  
24  
25  
26  
27  
28  
29  
30  
31  
32  
33  
34  
35  
36  
37  
38  
39  
40  
41  
42  
43  
44  
45  
46  
47  
48  
49  
50  
51  
52  
53  
54  
55  
56  
57  
58  
59  
60

*and they wouldn't see me. But that way I end up staying out there for hours 'cause I'm not going home empty-handed so I don't know what they think they're really achieving.* Charlene, Cisgender woman sex worker

### **Criminalisation of Clients: Severely limits sex workers' safety strategies**

Our findings indicate that criminalisation and policing strategies that target clients reproduce the harms, created by broader criminalisation of sex work. Analyses of prevalence of workplace physical and sexual violence against street-based sex workers in Vancouver indicated no statistically significant change in violence rates following policy implementation (OR=1.05, 95%CI:0.70-1.58; p=0.804). Specifically, in the 8-month period post-policy implementation, 24.6% (58/236) of sex workers experienced work-related physical and sexual violence (as compared to 23.7% (65/275) interviewed in the 8months pre-policy in 2012), of whom 22.0% reported physical abuse and 14.0% had been raped post-policy implementation (compared with 19.3% and 15.6% pre-policy, respectively).

Qualitative analysis of the sex workers' narratives, reveal three key mechanisms by which criminalisation and police targeting of clients continued to severely impacts sex workers' ability to negotiate their working conditions and transactions with clients, including protections from violence and HIV/STI infections.

#### ***1. Inability to Screen Clients and Negotiate Terms of Sexual Transactions***

Sex workers' narratives emphasized that, in the context where clients continue to be police targets, it remains in both the clients' and sex workers' interest not to get pulled over by police. Therefore, sex workers continue to be forced to severely limit or forego screening of prospective clients or negotiating the terms of sex work transactions



(e.g. fee, sexual services, condom use) before getting into a vehicle (Table 2). In addition to entering a prospective client's car swiftly, participants reported that in order to reduce the risk of attracting police attention, potential clients point them to an alleyway away from the main street with limited lighting to allow them to enter the vehicle undetected by police (Table 2). Policing of clients thus directly undermines sex workers ability to **screen potential clients** including, checking "bad date" sheets for past violent perpetrators, detecting possible weapons, or intoxication; and **negotiating the terms of the sexual transactions**, including where the date will take place, the fee and types of sexual services, and use of condoms, before entering a vehicle. These practices of screening and negotiating the terms of transactions have both been well documented as critical to sex workers' ability to control their health and safety, including protections from violence, abuse and HIV/STI infection.<sup>15 17 19</sup>

**Table 2: Criminalisation of Clients: Severely Limits Sex Workers' Safety Strategies  
Sex Worker Voices**

*Well, usually I try to hop in the car right away, right? 'Cause I don't want to get seen talking, in case a cop drives by or something. [...] I'll hop in and then we can like negotiate and talk, you know? First I like to make sure that nobody's around or following or anything. – Maria, Cisgender woman sex worker*

*To avoid police they [clients] drive by couple times and they point. They point at like a place where nobody's driving by. So they point and that means to go follow them with the vehicle and then they'll stop [...] They go somewhere different in an alley or something. They just leave like the window open and then you just, get in. [But would you talk to them first?] Um no well when they're trying to avoid police like that you just get into the vehicle, right. – Jane, Transgender woman sex worker*

*Sometimes the guy will drive up and just sort of wave or point to go down the alley or something like that somewhere else were he can pick me up. [How does that affect your safety?] You never know who it is right? And you can't really see his face, can't really see anything they could have a gun in their hand or. You know what I mean they could be a*

1  
2  
3  
4  
5  
6  
7  
8  
9  
10  
11  
12  
13  
14  
15  
16  
17  
18  
19  
20  
21  
22  
23  
24  
25  
26  
27  
28  
29  
30  
31  
32  
33  
34  
35  
36  
37  
38  
39  
40  
41  
42  
43  
44  
45  
46  
47  
48  
49  
50  
51  
52  
53  
54  
55  
56  
57  
58  
59  
60

*little bit drunk or something if you can't really see them very clearly, you know? And you don't you can't say hi or whatever before you get in. You have to just hurry up before the cops come. – Laura, Cisgender woman sex worker*

Prior to the VPD policy, police frequently engaged in undercover operations in order to target sex workers and their clients. This practice continues to shape sex work transactions and, in the context of sustained criminalisation of clients, undercover operations negatively affect the ability of sex workers to screen their clients or negotiate the terms of sexual transactions. Participants' accounts indicated that, rather than trying to assess the safety of entering a vehicle of a prospective client and negotiating the terms of the transaction, the initial interaction with a client is dictated by determining whether the sex worker is an undercover police officer. This usually involves both the client and sex worker touching each other, due to the belief that undercover police officers are not allowed to engage in bodily contact without identifying themselves as police.

*Normally when you get picked up, you go: Are you a cop? No, are you? Nope. Prove it. And you, touch each other just to make sure, right? 'Cause cops can't do that. So that's the rule, if you're undercover you can't touch someone. Normally, a guy'll touch my boob, I'll touch his crotch. Or he'll touch my crotch, I'll touch his, right? That's just to verify okay, you're not a cop, right? Martha, Cisgender woman sex worker*

## 2. Displacement to Isolated Areas

Sex workers' accounts further indicated that, in the context of continued criminalisation of clients, many clients demand on engaging in sex work transactions away from known sex work areas where there is heightened police presence. Participants reported that being alone with clients in often unknown,

1  
2  
3 secluded, industrial areas where there is little chance for help puts women at  
4  
5 increased risk of violence and rape and reduces their ability to negotiate the  
6  
7 transaction on their terms, elevating their risks for client condom refusal and thus  
8  
9 HIV/STI infection (Table 3).  
10  
11  
12  
13  
14  
15  
16  
17  
18  
19  
20  
21  
22  
23  
24  
25  
26  
27  
28  
29

30  
31 **Table 3: Criminalisation of Clients: Displaces Street-Based Sex Work to Isolated Areas  
Sex Worker Voices**

32 *Clients worry [about police]. Like for me I don't like going outside the*  
33 *neighborhood, right. Cause, you know what about if the guy turns out to be*  
34 *an asshole. [...] That's how I do loose dates by not going where I'm supposed*  
35 *to cause they're afraid of cops. [So do you turn dates down sometimes?]*  
36 *Yeah sometimes but not all the time cause when I'm I'm really in need of*  
37 *money I will maybe try and go. But then I just try and get a good feel of them*  
38 *first. - Jane, Transgender woman sex worker*

39  
40  
41  
42 *Clients are worried about police. To avoid police they wanna move to a*  
43 *different area. I don't want to go out of my zone right. [...] Once you get out*  
44 *there, like you know their turf so it's harder for me cause it's their comfort*  
45 *zone or, so hey act differently, you know what I mean. Yeah it never ends up*  
46 *good. - Sandra, Cisgender woman sex worker*

47  
48  
49 *We try to get away from the area as quick as possible. You know. So that*  
50 *we're not in the area. Right. The farther away you get from [name of sex*  
51 *work stroll], the better it is. You're not gonna get pulled over right? I'm just*  
52 *a little nervous as it's so quiet down there by [industrial area]. - Violet,*  
53 *Cisgender woman sex worker*  
54  
55

56  
57  
58 **3. Inability to Access Police Protections**  
59  
60

1  
2  
3  
4  
5 The main objective of the police enforcement guidelines is to foster more trusting  
6  
7 relationships between sex workers and police and prioritize the safety of sex workers in  
8  
9 any police interactions. A striking feature of many sex workers' accounts was that police  
10  
11 inquiring about their safety was perceived as a nuisance at best, and a form of police  
12  
13 harassment, at worst. In a context where clients continue to be police enforcement  
14  
15 targets, sex workers' narratives indicated it is difficult for police to fulfill their stated  
16  
17 objective of prioritizing the safety of sex workers. Even conversations between sex  
18  
19 workers and police can have a destabilizing effect, as any police interactions may scare  
20  
21 away clients and have the potential to raise suspicion that a sex worker might be an  
22  
23 undercover police officer (Table 4).  
24  
25  
26  
27  
28

29  
30 Similarly, an important aspect of sex workers' safety is the ability to report theft,  
31  
32 violence and sexual harassment to police. Currently however, the majority of sex  
33  
34 workers voiced reservations about reporting such incidents to police. Many sex workers,  
35  
36 drawing on historic discrimination and maltreatment by police, doubted that police  
37  
38 would take their complaints seriously and voiced that the continued criminalisation of  
39  
40 clients constituted a significant barrier to reporting violence to police as any information  
41  
42 about where they work could be used to refine enforcement strategies targeting clients.  
43  
44  
45  
46

47 **Table 4: Criminalisation of Clients: Prevents Access to Police Protections**  
48 **Sex Worker Voices**

49 Destabilizing effect of police safety checks

50  
51  
52 *It's a drag, you know? I'm out there to make money, not waste twenty minutes talking*  
53 *to them [police]. And then I'm talking to them and half the dates that see me talking to*  
54 *them now think maybe I'm a cop, so they don't wanna stop, now they know the cops are*  
55 *around, they don't wanna stop, or they wonder what I've done to attract the cops so*  
56 *they don't wanna stop, like, it's just a hassle, you know? – Charlene, Cisgender woman*  
57  
58  
59  
60

1  
2  
3  
4  
5  
6  
7  
8  
9  
10  
11  
12  
13  
14  
15  
16  
17  
18  
19  
20  
21  
22  
23  
24  
25  
26  
27  
28  
29  
30  
31  
32  
33  
34  
35  
36  
37  
38  
39  
40  
41  
42  
43  
44  
45  
46  
47  
48  
49  
50  
51  
52  
53  
54  
55  
56  
57  
58  
59  
60

sex worker

*If the clients see you talking to the cops then they don't pick you up. [When police talk to me] they're respectful but they know that they're wasting my time so. They can do whatever they want. They're fucking up everything. – Selina, Transgender woman sex worker*

#### Reporting violence to police

*No I would never go to the cops [to report violence]. Because it makes it look like, we shouldn't be out there like we can't take care of ourselves. I feel like if I went and reported some of these things that it might do more harm to the working profession than do good. So I don't do that. Basically we have to fend for ourselves. They don't really like us to begin with. – Rose, Cisgender woman sex worker*

*I've needed the police's help with bad dates and they've done absolutely nothing. The fact that it's not legalized you kinda can't do it, you know. – Charlene, Cisgender woman sex worker*

## DISCUSSION

These findings suggest that criminalisation and policing strategies that target clients reproduce the harms, created by the criminalisation of sex workers, in particular, risks for violence and abuse. Contrary to the goal of criminalizing clients, our findings suggest that this approach has limited to no effect on preventing street-based sex work and did not reduce the prevalence of sex work related violence. Our analysis provides strong empirical evidence of the lived experience of sex workers indicating that the continued criminalisation and policing of clients, even when sex workers are no longer police targets, profoundly impacted sex workers ability to negotiate their working conditions and health and safety. Collectively, this research suggests that displacement to isolated areas and inability to screen clients or negotiate the terms of sexual transactions directly reduced sex workers' ability to refuse unwanted clients or services

1  
2  
3 (e.g. sex without a condom), thereby increasing risks for physical and sexual violence  
4  
5  
6 and HIV/STI infection. In addition, despite improved relations between sex workers and  
7  
8 police, continued police targeting of clients created mistrust of police and severely  
9  
10 limited sex workers ability to access police protections.  
11

12  
13 In a legal environment where clients remain the target of enforcement, our  
14  
15 findings indicate a shared interest of sex workers and clients to remain undetected by  
16  
17 police, forcing sex workers to rush or completely forgo client screening, and pushings  
18  
19 sex workers to work in secluded areas away from street lighting and other passers by.  
20  
21 These findings reflect earlier epidemiological and social science research that have  
22  
23 consistently demonstrated a direct correlation between criminalisation and policing of  
24  
25 street-based sex work and elevated odds of physical violence and rape, as well as  
26  
27 HIV/STI infection through client condom refusal.<sup>6 10 11 15 5 18</sup> This work has identified  
28  
29 screening of prospective clients as essential to allowing sex workers to take safety  
30  
31 precautions, including agreement on where the transaction will take place, checking  
32  
33 'bad date' reports describing the personal characteristics and/or vehicle of known  
34  
35 violent perpetrators, and checking for the presence of weapons and intoxication.<sup>12</sup> In  
36  
37 addition to screening, negotiating the terms of sexual transactions with clients before  
38  
39 entering the vehicle, including the fee, and types of sexual services, remains critical for  
40  
41 sex workers to negotiate the terms of their work, and avoid risky sexual encounters (e.g.  
42  
43 unprotected sex). Without the opportunity to screen clients or safely negotiate the  
44  
45 terms of sexual services, research has shown that sex workers face increased risks of  
46  
47 violence, abuse and HIV/STI infection.<sup>15 17 18 37 38</sup> Our findings resonate with evaluations  
48  
49  
50  
51  
52  
53  
54  
55  
56  
57  
58  
59  
60

1  
2  
3 from Sweden that reported, since the implementation of the law that criminalizes  
4 clients, there had been an increase in violence experienced by sex workers, which was  
5  
6 linked to greater risk taking in client selection due to the necessity of rushed negotiation  
7  
8  
9 with potential clients.<sup>28 29</sup>  
10  
11

12  
13 Police undercover operations further reduce the safety of sex workers as initial  
14 interactions with clients focus on determining that sex workers are not undercover  
15 police officers, rather than allowing time to negotiate the details of the transaction,  
16 including condom use, type of service and price. The negative impact of undercover  
17 police operations on the safety and health of sex workers is of note as it is one of the  
18 main enforcement strategies available to police in a context where clients are  
19 criminalized. Sex workers also described how police used other non-prostitution related  
20 offenses (e.g. administrative laws such as trafficking violations, public nuisance) to  
21 target sex workers and clients.  
22  
23  
24  
25  
26  
27  
28  
29  
30  
31  
32  
33  
34  
35

36 The results of this study further highlight that in a context where sex buyers are  
37 criminalized, sex workers continue to be displaced, as many clients insist on engaging in  
38 sex work transactions away from police scrutiny. Being displaced to unknown, secluded,  
39 industrial areas where there is little chance of receiving help when needed is linked to  
40 increased risk of violence and rape and reduces sex workers' ability to negotiate the  
41 transaction on their terms, including condom use.<sup>15 17 37 38</sup>  
42  
43  
44  
45  
46  
47  
48  
49  
50

51 Evidence both in Canada and globally has consistently shown that  
52 criminalisation of sex workers prevents sex workers from accessing police protection,  
53 whereby police become adversaries as opposed to safety mechanisms.<sup>6 9 10 22 29</sup> A clear  
54  
55  
56  
57  
58  
59  
60

1  
2  
3 example is the case of the detrimentally flawed police investigation of the serial murder  
4  
5 of the Missing Women in Vancouver, Canada; where criminalisation, and historic  
6  
7 discrimination by police were found to be a key factors in putting police in an adversarial  
8  
9 relationship with sex workers.<sup>32</sup> In addition to the deeply engrained stigma of sex work  
10  
11 and the historic police discrimination of sex workers, our findings indicate that when sex  
12  
13 work clients are police enforcement targets, many sex workers remain reluctant to seek  
14  
15 police protection. Sex workers worry about disclosing details of how they operate and  
16  
17 where they work for fear police may use this information to refine their enforcement  
18  
19 strategies that target sex work clients. This study also identified that in a context of  
20  
21 continued police enforcement of sex work clients, even conversations with police about  
22  
23 safety can have a destabilizing effect, as any police interactions scare away clients and  
24  
25 have the potential to rise suspicion a sex worker might be an undercover police officer  
26  
27 or a police informant. This policing practice deters women from interacting with police  
28  
29 and undermines the main objective of the VPD policing guidelines, which is to prioritize  
30  
31 the safety of sex workers. In addition to scaring away potential clients, and thus  
32  
33 potentially reducing the income women rely upon, being labelled as a police informant  
34  
35 can place a woman at the bottom of street hierarchy and may place her at severe risk  
36  
37 for violence.  
38  
39  
40  
41  
42  
43  
44  
45  
46  
47

48  
49 While rhetorically powerful and politically appealing, there is a fundamental  
50  
51 conceptual inconsistency in policies that criminalize clients and purport to prioritize the  
52  
53 safety of sex workers. In its original incarnation, the model of criminalizing clients in  
54  
55 Sweden was not designed to increase the safety of women *in* sex work; rather its goal  
56  
57  
58  
59  
60



1  
2  
3 was to eradicate prostitution and increase the safety of women who exit sex work.  
4  
5  
6 Indeed, in Sweden, the government explicitly condoned the increased risks that  
7  
8 marginalized sex workers were exposed to by arguing that any adverse effects on  
9  
10 women who remain in sex work were outweighed by the message of the law that  
11  
12 prostitution is not tolerated.<sup>28</sup> Our findings indicate that policies that criminalize clients  
13  
14 are, in practice, not reconciled with policies that aim to prioritize the safety of sex  
15  
16 workers, such as outlined in VPD sex work enforcement guidelines. Indeed, the findings  
17  
18 of our study indicate that despite police efforts to prioritize the safety of sex workers,  
19  
20 when clients remain enforcement targets, sex workers continue to be at increased risk  
21  
22 for physical and sexual violence and perceive police concern for their safety as a form of  
23  
24 nuisance and harassment.  
25  
26  
27  
28  
29

30  
31 Street-involved sex workers, those living in poverty, Aboriginal sex workers and  
32  
33 transgender sex workers have historically been exposed most directly to the negative  
34  
35 effects of restrictive policing and criminalized sex work laws.<sup>14 15 28</sup> Evidence from  
36  
37 Sweden indicates that criminalizing clients negatively affected the working conditions  
38  
39 and safety of all segments of sex workers by further pushing them underground.  
40  
41 However, marginalized sex workers who solicit and/or service on the street were most  
42  
43 negatively impacted by the criminalisation of clients, as they may not have the  
44  
45 resources to reduce police scrutiny by advertising online, or be contacted by phone.<sup>28</sup>  
46  
47  
48  
49 Due to a less developed welfare system in Canada, and the larger population of street-  
50  
51 based sex workers compared to Sweden, the negative impact of demand criminalisation  
52  
53 on sex workers health and safety will likely be even more pronounced in the Canadian  
54  
55  
56  
57  
58  
59  
60

1  
2  
3 context.  
4  
5

6 The very existence of specific laws to regulate sex work speaks to the stigma  
7 associated with sex work and the link between sex work legislation and morality.<sup>39</sup> In  
8 Canada, as in most settings globally, there are already laws in place for targeting various  
9 forms of exploitation and nuisance that may arise in the context of sex work, such as  
10 public disturbance, indecent exhibition, coercion, sexual assault, trafficking persons,  
11 extortion, and kidnapping. As such, given the negative impact of criminalized sex work  
12 laws and enforcement practices, our findings lend further support to calls for the full  
13 decriminalisation of sex work in Canada, consistent with international guidelines by  
14 global policy bodies.<sup>1 29</sup>  
15  
16  
17  
18  
19  
20  
21  
22  
23  
24  
25  
26  
27

28 New Zealand, and parts of Australia, have decriminalized sex work. In New  
29 Zealand, workplace health and safety standards have been established in consultation  
30 with sex workers, and sex workers can bring employment complaints to governing  
31 bodies.<sup>27</sup> The New Zealand Prostitution Reform Act enacted in 2003 treats sex work as  
32 any other business, regulating its commercial practice through standard employment  
33 Health and Safety regulations; regulating the location of commercial sex establishments  
34 through zoning by-laws; and specifying the health and safety obligations of managers  
35 and workers.<sup>39</sup> Although decriminalisation is by no means a panacea, there is significant  
36 evidence to suggest that, in New Zealand, it has created improved working conditions  
37 for sex workers, including increased ability to report violence to police.<sup>40</sup> The removal of  
38 criminalized and enforcement-based approaches to sex work will also help to support  
39 access and implementation of other health and social interventions not currently  
40  
41  
42  
43  
44  
45  
46  
47  
48  
49  
50  
51  
52  
53  
54  
55  
56  
57  
58  
59  
60

1  
2  
3 available to the most criminalized, street-involved sex workers; such as safer indoor  
4  
5 work and housing spaces, integrated health and social welfare supports, substance use  
6  
7 prevention and treatment, and opportunities for alternative employment for those sex  
8  
9 workers who chose to transition out of sex work.  
10  
11

12  
13 This study has limitations. The lived experiences of participants represented in  
14  
15 this study reflect street-involved sex workers living in poverty and may not be  
16  
17 representative of the experiences of sex workers in other segments of the industry.  
18  
19 However, given that evidence has consistently shown that criminalisation and policing  
20  
21 disproportionately target street-based sex workers, we feel these narratives provide  
22  
23 critical evidence of the health and safety harms of such a policy.  
24  
25  
26  
27

28  
29 In summary, this study suggests that enforcement strategies that target sex work  
30  
31 clients reproduce the harms related to criminalized and quasi-criminalized approaches  
32  
33 to the regulation of sex work. This empirical research clearly demonstrates that  
34  
35 continued criminalisation and policing of clients, even in a context where sex workers no  
36  
37 longer represent police targets, did not reduce the prevalence of sex work related  
38  
39 violence and profoundly impacted sex workers' ability to negotiate their working  
40  
41 conditions, health and safety, including protections from violence, abuse and HIV/STI  
42  
43 infection. Sex workers were displaced to isolated areas with few protections from  
44  
45 violence and abuse; were forced to rush or forgo screening clients and negotiating the  
46  
47 terms of transactions (e.g. fee, condom use) and agree to clients or sexual services they  
48  
49 would otherwise refuse; and were unable to access police protections. The results also  
50  
51 highlight the critical role of sex workers' lived experiences in any evidence-based policy  
52  
53  
54  
55  
56  
57  
58  
59  
60

1  
2  
3 making in Canada and globally. Two decades of failures of prostitution laws in Canada  
4  
5 stemmed from failure of consecutive governments to listen to strong evidence by sex  
6  
7 workers, academics and human rights experts that the laws were creating and  
8  
9 exacerbating devastating harms to sex workers' safety, health and human rights,  
10  
11 including violence, abuse and murder. In sum, this study raises serious questions about  
12  
13 legislative approaches that criminalize clients and suggests that 'demand criminalisation'  
14  
15 risks reproducing the devastating harms to health safety and human rights created by  
16  
17 the criminalisation of sex workers.  
18  
19  
20  
21  
22  
23  
24  
25  
26  
27  
28  
29  
30  
31  
32  
33  
34  
35  
36  
37  
38  
39  
40  
41  
42  
43  
44  
45  
46  
47  
48  
49  
50  
51  
52  
53  
54  
55  
56  
57  
58  
59  
60

**Figure legend**

Figure 1: Prostitution-Related Criminal Code Offenses Vancouver 2010-2013

**ACKNOWLEDGEMENTS**

We thank all the women who contributed their time and expertise to this project, as well as research, community partners, and advisory board members. We wish to acknowledge Peter Vann, Gina Willis and Jennifer Morris for their research and administrative support.

**COMPETING INTERESTS**

None

**FUNDING**

This research was supported by operating grants from the US National Institutes of Health (R01DA033147) and Canadian Institutes of Health Research. KS is partially supported by US National Institutes of Health (R01DA028648), Canadian Institutes of Health Research and Michael Smith Foundation for Health Research. JM is supported by the British Columbia Ministry of Health and by the US National Institutes of Health (R01DA036307).

**CONTRIBUTORS**

KS is the principal investigator and senior author of the study and takes full responsibility for the integrity of the study procedures and data collection, management and analysis. AK, KP, JC, KS conceptualized this study and AK oversaw the field team

1  
2  
3 carrying out the study. AK, CT conducted the interviews. AK, JC conducted the  
4  
5 ethnographic observation. AK analyzed the data using Atlas software, wrote the original  
6  
7 draft of the article and incorporated feedback from all co-authors. KP, CT, JC, LB, SA, DB,  
8  
9 TK, JM, KS provided content expertise and critical feedback on the analyses and  
10  
11 interpretation. All authors read and approved the final draft.  
12  
13  
14

#### 15 16 17 18 **Data sharing** 19

20  
21 No additional data available.  
22  
23  
24  
25  
26  
27  
28  
29  
30  
31  
32  
33  
34  
35  
36  
37  
38  
39  
40  
41  
42  
43  
44  
45  
46  
47  
48  
49  
50  
51  
52  
53  
54  
55  
56  
57  
58  
59  
60

## REFERENCES

1. WHO, UNAIDS, UNICEF. *Global HIV/AIDS Response: Epidemic Update and Health Sector Progress towards Universal Access*. Geneva: World Health Organization. 2011.  
[http://whqlibdoc.who.int/publications/2011/9789241502986\\_eng.pdf?ua=](http://whqlibdoc.who.int/publications/2011/9789241502986_eng.pdf?ua=)  
(accessed 7 Feb 2014).
2. Rhodes T, Simic M, Baros S, et al. Police violence and sexual risk among female and transvestite sex workers in Serbia: qualitative study. *BMJ* 2008;337.
3. Simić M, Rhodes T. Violence, dignity and HIV vulnerability: Street sex work in Serbia. *Sociol Health Illn* 2009;31:1-16.
4. Gruskin S, Williams Pierce G, Ferguson L. Realigning government action with public health evidence: the legal and policy environment affecting sex work and HIV in Asia. *Cult Health Sex* 2013:1-16.
5. Platt L, Jolley E, Rhodes T, et al. Factors mediating HIV risk among female sex workers in Europe: a systematic review and ecological analysis. *BMJ Open* 2013;3.
6. Shannon K, Csete J. Violence, condom negotiation, and HIV/STI risk among sex workers. *JAMA* 2010;304:573-74.
7. Platt L, Rhodes T, Judd A, et al. Effects of sex work on the prevalence of syphilis among injection drug users in 3 Russian cities. *Am J Public Health* 2007;97:478.
8. Shannon K, Montaner JG. The politics and policies of HIV prevention in sex work. *The Lancet Infectious Diseases* 2012;12:500.

- 1  
2  
3 9. Okal J, Chersich MF, Tsui S, et al. Sexual and physical violence against female sex  
4  
5  
6 workers in Kenya: a qualitative enquiry. *AIDS Care* 2011;23:612-18.  
7
- 8  
9 10. Shannon K, Kerr T, Allinott S, et al. Social and structural violence and power relations  
10  
11 in mitigating HIV risk of drug-using women in survival sex work. *Soc Sci Med*  
12  
13 2008;66:911-21.  
14
- 15  
16 11. Rekart ML. Sex-work harm reduction. *The Lancet* 2006;366:2123-34.  
17
- 18  
19 12. Sanders T. The risks of street prostitution: Punters, police and protesters. *Urban*  
20  
21 *Studies* 2004;41:1703-17.  
22
- 23  
24 13. Lowman J. Violence and the outlaw status of (street) prostitution in Canada.  
25  
26 *Violence against Women* 2000;6:987-1011.  
27
- 28  
29 14. Sanders T, Campbell R. Designing out vulnerability, building in respect: violence,  
30  
31 safety and sex work policy. *Brit J Sociol* 2007;58:1-19.  
32
- 33  
34 15. Shannon K, Strathdee SA, Shoveller J, et al. Structural and environmental barriers to  
35  
36 condom use negotiation with clients among female sex workers: implications for  
37  
38 HIV-prevention strategies and policy. *Am J Public Health* 2009;99:659-65.  
39
- 40  
41 16. Maher L, Mooney-Somers J, Phlong P, et al. Selling sex in unsafe spaces: sex work  
42  
43 risk environments in Phnom Penh, Cambodia. *Harm Reduct J* 2011;8:30.  
44
- 45  
46 17. Krüsi A, Chettiar J, Ridgway A, et al. Negotiating Safety and Sexual Risk Reduction  
47  
48 With Clients in Unsanctioned Safer Indoor Sex Work Environments: A Qualitative  
49  
50 Study. *Am J Public Health*, 2012:1154-59.  
51  
52  
53  
54  
55  
56  
57  
58  
59  
60



- 1  
2  
3  
4  
5  
6  
7  
8  
9  
10  
11  
12  
13  
14  
15  
16  
17  
18  
19  
20  
21  
22  
23  
24  
25  
26  
27  
28  
29  
30  
31  
32  
33  
34  
35  
36  
37  
38  
39  
40  
41  
42  
43  
44  
45  
46  
47  
48  
49  
50  
51  
52  
53  
54  
55  
56  
57  
58  
59  
60
18. Deering KN, Lyons T, Feng CX, et al. Client Demands for Unsafe Sex: The Socioeconomic Risk Environment for HIV Among Street and Off-Street Sex Workers. *JAIDS* 2013;63:522-31.
19. Shannon K, Kerr T, Strathdee SA, et al. Prevalence and structural correlates of gender based violence among a prospective cohort of female sex workers. *BMJ* 2009;339.
20. Lippman SA, Donini A, Diaz J, et al. Social-environmental factors and protective sexual behavior among sex workers: the Encontros intervention in Brazil. *Am J Public Health* 2010;100:S216-23.
21. Kerrigan D, Ellen JM, Moreno L, et al. Environmental-structural factors significantly associated with consistent condom use among female sex workers in the Dominican Republic. *AIDS* 2003;17:415-23.
22. Richter ML, Chersich MF, Scorgie F, et al. Sex work and the 2010 FIFA World Cup: time for public health imperatives to prevail. *Global Health* 2010;6:1.
23. Lazarus L, Deering KN, Nabess R, et al. Occupational stigma as a primary barrier to health care for street-based sex workers in Canada. *Cult Health Sex* 2012;14:139-50.
24. Boynton P, Cusick L. Sex workers to pay the price: UK plans to cut street prostitution will threaten sex workers' health. *BMJ* 2006;332:190.
25. Scorgie F, Nakato D, Harper E, et al. We are despised in the hospitals: sex workers' experiences of accessing health care in four African countries. *Cult Health Sex* 2013;15:450-65.

- 1  
2  
3  
4 26. Oppenheim M. MEPs vote to criminalise buying sex. *The Guardian* 2014 26 February  
5  
6 2014.  
7  
8  
9 27. Goodyear M, Weitzer R. International trends in the control of sexual services.  
10  
11 *Policing pleasure: Sex work, policy and the state in globalperspective, ed. S.*  
12  
13 *Dewey and P. Kelly* 2011:16-30.  
14  
15  
16 28. Scoular J. Criminalizing 'punters': evaluating the Swedish position on prostitution.  
17  
18 *Journal of Social Welfare and Family Law* 2004;26:195-210.  
19  
20  
21 29. Global Commission on HIV and the Law. *HIV and the Law: Risks, Rights, & Health.*  
22  
23 2012. [http://www.undp.org/content/dam/undp/library/HIV-AIDS/Governance of](http://www.undp.org/content/dam/undp/library/HIV-AIDS/Governance%20of%20HIV%20Responses/Commissions%20report%20final-EN.pdf)  
24  
25 [HIV Responses/Commissions report final-EN.pdf](http://www.undp.org/content/dam/undp/library/HIV-AIDS/Governance%20of%20HIV%20Responses/Commissions%20report%20final-EN.pdf) (accessed 4 Feb 2014)  
26  
27  
28 30. Canada Supreme Court. *Decision, Canada (Attorney General) vs. Bedford, Ottawa:*  
29  
30 Supreme Court of Canada; 2013. [http://scc-csc.lexum.com/decisia-scc-csc/scc-](http://scc-csc.lexum.com/decisia-scc-csc/scc-csc/scc-csc/en/item/13389/index.do)  
31  
32 [csc/scc-csc/en/item/13389/index.do](http://scc-csc.lexum.com/decisia-scc-csc/scc-csc/scc-csc/en/item/13389/index.do) (accessed 3 Feb 2014)  
33  
34  
35 31. Crawford A. Peter MacKay faces balancing act with justice agenda, court rulings.  
36  
37 *Canadian Broadcasting Corporatio.* January 27 2014.  
38  
39 [http://www.cbc.ca/news/politics/peter-mackay-faces-balancing-act-with-justice-](http://www.cbc.ca/news/politics/peter-mackay-faces-balancing-act-with-justice-agenda-court-rulings-1.2511220)  
40  
41 [agenda-court-rulings-1.2511220](http://www.cbc.ca/news/politics/peter-mackay-faces-balancing-act-with-justice-agenda-court-rulings-1.2511220) (accessed 2 Mar 2014)  
42  
43  
44 32. Oppal W. Forsaken: The Report on the Missing and Murdered Women Commission  
45  
46 of Inquiry. British Columbia, 2012.  
47  
48 [http://www.ag.gov.bc.ca/public\\_inquiries/docs/Forsaken-ES.pdf](http://www.ag.gov.bc.ca/public_inquiries/docs/Forsaken-ES.pdf) (accessed 3  
49  
50 Mar 2014).  
51  
52  
53  
54  
55  
56  
57  
58  
59  
60

- 1  
2  
3  
4  
5  
6  
7  
8  
9  
10  
11  
12  
13  
14  
15  
16  
17  
18  
19  
20  
21  
22  
23  
24  
25  
26  
27  
28  
29  
30  
31  
32  
33  
34  
35  
36  
37  
38  
39  
40  
41  
42  
43  
44  
45  
46  
47  
48  
49  
50  
51  
52  
53  
54  
55  
56  
57  
58  
59  
60
33. Vancouver Police Department. Sex work enforcement guidelines, 2013.  
<http://vancouver.ca/police/assets/pdf/reports-policies/sex-enforcement-guidelines.pdf> (accessed 7 Jan 2014).
34. Vancouver Police Department. *Counter Exploitation Unit*.  
<http://vancouver.ca/police/organization/investigation/investigative-services/special-investigation/vice.html> (accessed 7 Jan 2014).
35. Shannon K, Bright V, Allinott S, et al. Community-based HIV prevention research among substance-using women in survival sex work: The Maka Project Partnership. *Harm Reduct J* 2007;4:20.
36. Vancouver Police Department. *Statistical Reports by District and City totals*.  
<https://vancouver.ca/police/Planning/StatsDistrict/2013/2012-2013YTD.pdf> (accessed 7 Jan 2014).
37. Decker MR, McCauley HL, Phuengsamran D, et al. Violence victimisation, sexual risk and sexually transmitted infection symptoms among female sex workers in Thailand. *Sex Transm Infect* 2010;86:236-40.
38. Decker MR, Wirtz AL, Baral SD, et al. Injection drug use, sexual risk, violence and STI/HIV among Moscow female sex workers. *Sex Transm Infect* 2012;88:278-83.
39. Bruckert C, Hannem S. Rethinking the Prostitution Debates: Transcending Structural Stigma in Systemic Responses to Sex Work. *Canadian Journal of Law and Society* 2013;28:43-63.
40. Abel G, Fitzgerald L, Brunton C. The impact of decriminalisation on the number of sex workers in New Zealand. *J Soc Policy* 2009;38:515-31.

1  
2  
3  
4  
5  
6  
7  
8  
9  
10  
11  
12  
13  
14  
15  
16  
17  
18  
19  
20  
21  
22  
23  
24  
25  
26  
27  
28  
29  
30  
31  
32  
33  
34  
35  
36  
37  
38  
39  
40  
41  
42  
43  
44  
45  
46  
47  
48  
49  
50  
51  
52  
53  
54  
55  
56  
57  
58  
59  
60

For peer review only

1  
2  
3  
4  
5  
6  
7  
8  
9  
10  
11  
12  
13  
14  
15  
16  
17  
18  
19  
20  
21  
22  
23  
24  
25  
26  
27  
28  
29  
30  
31  
32  
33  
34  
35  
36  
37  
38  
39  
40  
41  
42  
43  
44  
45  
46  
47  
48  
49  
50  
51  
52  
53  
54  
55  
56  
57  
58  
59  
60

CRIMINALISATION OF CLIENTS: **REPRODUCING** VULNERABILITIES FOR  
VIOLENCE AND POOR HEALTH AMONG STREET-BASED SEX WORKERS  
IN CANADA  
A QUALITATIVE STUDY

A Krüsi,<sup>1</sup> K Pacey,<sup>2</sup> L Bird,<sup>3</sup> C Taylor,<sup>1</sup> J Chettiar,<sup>1,3</sup> S Allan,<sup>1</sup> D Bennett,<sup>2</sup>

JS Montaner,<sup>1,4</sup> T Kerr,<sup>1,2</sup> K Shannon<sup>1,4</sup>

1. Gender and Sexual Health Initiative, British Columbia Centre for Excellence in HIV/AIDS, St. Paul's Hospital, 608-1081 Burrard Street, Vancouver, BC, CANADA, V6Z 1Y6
2. Pivot Legal Society, 121 Heatley Avenue, Vancouver, CANADA, V6A 3E9
3. Sex Workers United Against Violence, Vancouver, CANADA
4. Department of Medicine, University of British Columbia, St. Paul's Hospital, 608-1081 Burrard Street, Vancouver, BC, CANADA, V6Z 1Y6

Send correspondence to:

**Kate Shannon**, PhD, MPH  
Associate Professor, Department of Medicine  
University of British Columbia  
Director, Gender and Sexual Health Initiative  
B.C. Centre for Excellence in HIV/AIDS  
St. Paul's Hospital, 608-1081 Burrard Street,  
Vancouver, B.C., V6Z 1Y6, Canada  
**Tel:** (604) 804-9459  
**Fax:** (604) 806-9044  
**Email:** [gshi@cfenet.ubc.ca](mailto:gshi@cfenet.ubc.ca)

Keywords: sex work, violence, HIV/AIDS, sexual health, criminalisation

Word Count: **5967684**

Tables: 4

Figures: 1

**ABSTRACT**

**Objectives:** To explore how criminalisation and policing of sex buyers (clients) rather than sex workers, shapes sex workers' working conditions and sexual transactions including risk of violence and HIV/STI infections.

**Design:** Qualitative and ethnographic study triangulated with [sex work-related violence prevalence data and](#) publicly available police statistics.

**Setting:** Vancouver, Canada provides a unique opportunity to evaluate the impact of policies that criminalize clients as the local police department adopted a sex work enforcement policy in January 2013 that prioritize sex workers' safety over arrest, while continuing to target ~~enforcement efforts towards~~ clients.

**Participants:** 26 cisgender and 5 transgender women street-based sex workers (n=31) participated in semi-structured interviews about their working conditions. All ~~participants had experience with street-based sex work and~~ had exchanged sex for money in the previous 30 days in Vancouver.

**Outcome measures:** Thematic analysis of interview transcripts and ethnographic field notes focused on how police enforcement of clients shaped sex workers' working conditions and sexual transactions, including risk of violence and HIV/STI infections, over an 11 month period post-policy implementation (January-November 2013).

**Results:** Sex workers' narratives and ethnographic observations indicated that while police sustained a high level of visibility they eased charging or arresting sex workers and showed increased concern for their safety. However, participants' accounts and police statistics indicated continued police enforcement of clients. This profoundly impacted the safety strategies sex workers employed. Sex workers continued to mistrust police, had to rush screening clients, and were displaced to outlying areas with increased risks of violence, including being forced to engage in unprotected sex.

**Conclusions:** [These findings suggest that criminalisation and policing strategies that target clients reproduce the harms, created by the criminalisation of sex work, in particular, vulnerability to violence and HIV/STI infection.](#) ~~These results suggest when police target clients, sex workers continue to be at increased risk of violence and adverse health outcomes, including HIV/STI infections.~~ The current findings support decriminalisation of sex work to ensure work conditions that support the health and safety of sex workers in Canada and globally.

[300/300](#)

1  
2  
3  
4  
5  
6  
7  
8  
9  
10  
11  
12  
13  
14  
15  
16  
17  
18  
19  
20  
21  
22  
23  
24  
25  
26  
27  
28  
29  
30  
31  
32  
33  
34  
35  
36  
37  
38  
39  
40  
41  
42  
43  
44  
45  
46  
47  
48  
49  
50  
51  
52  
53  
54  
55  
56  
57  
58  
59  
60

For peer review only

**Strengths and limitations of this study:**

- This is the first empirical study of how criminalisation and policing of sex buyers shapes sex workers' risks for violence and poor health, outside of a small body of research in Scandinavia
- This study draws on data of the lived experiences of sex workers from 31 qualitative interviews triangulated with ethnographic observations, [sex work-related violence prevalence data and](#) publicly available police statistics.
- The data represented in this study reflect the experiences of primarily street-based sex workers, disproportionately impacted by policing and thus, may not be representative of other segments of the sex industry
- This study is a qualitative evaluation post-implementation of a new enforcement policy targeting sex buyers, rather than sex workers, and as such, likely underestimates the full impact of any legislative change to criminalize the purchasing of sex



## INTRODUCTION

**“Harassing the clients is exactly the same as harassing the women. You harass the clients and you are in exactly the same spot you were before. I’m staying on the streets. I’m in jeopardy of getting raped, hurt.”**

**- Jasmine, Cisgender Women Sex Worker**

There is now a well-established body of epidemiological and social science research globally pointing to the negative impact of legislation and policies that criminalize sex work on violence and other health risks including HIV/STI infection among sex workers.<sup>1-7</sup> The criminalisation of some or all aspects of prostitution remains the dominant legal approach globally,<sup>1 4</sup> despite growing empirical evidence and clear international guidelines by the World Health Organization, UNAIDS, UNDP, and UNFPA calling for full decriminalisation of sex work as necessary to promoting the health and human rights of sex workers. (see Supplementary materials for a summary of legal and regulatory responses to sex work)

Enforcement-based approaches and policing within criminalized frameworks have consistently been linked to elevated risks for violence, and reduced ability to negotiate safer sex transactions, including prevention of HIV and other sexually transmitted infections (STIs).<sup>1-3 6 8</sup> Previous research indicates that in criminalized settings, policing strategies can range from surveillance and crackdowns to arrests or threats of arrest, intimidation by police, and police violence can be frequent and go largely unreported.<sup>2 9-12</sup> These risks are amplified for the most marginalized and visible sex workers, those living in poverty and working on the street.<sup>10 13 14</sup> In an effort to avoid police, sex workers often move to outlying secluded areas to meet and service clients where there are few to no protections from violence and abuse, and reduced

1  
2  
3 ability to refuse unwanted clients or services, including client demands for sex without a  
4  
5 condom.<sup>9 10 15-17</sup> Criminalisation and policing force sex workers to rush or forgo  
6  
7 screening prospective clients or negotiating the terms of sexual transactions before  
8  
9 entering a vehicle, placing sex workers at increased risk of physical violence, rape and  
10  
11 HIV/STI infection.<sup>9 18 19</sup> Criminalisation of sex work also impedes access to safer indoor  
12  
13 work environments, particularly for those most socially and economically marginalized.  
14  
15 Previous research undertaken in Canada and internationally has indicated that indoor  
16  
17 sex work environments with structural supports including supportive management  
18  
19 policies, security measures, and access to HIV/STI prevention resources, increase sex  
20  
21 workers' control over sexual transactions with clients, including protections from  
22  
23 violence, abuse, and HIV/STI infections and promote sex workers ability to access police  
24  
25 protections in cases of violence.<sup>17 20 21</sup>

26  
27  
28  
29  
30  
31  
32  
33 The criminalisation of sex work has also been found to prevent sex workers from  
34  
35 reporting violent perpetrators and seeking legal recourse after physical or sexual  
36  
37 assault.<sup>9 22</sup> There is also growing evidence that legislation criminalizing sex work  
38  
39 constitutes a significant barrier to accessing health care services, including primary care,  
40  
41 HIV treatment and prevention, and sexual health services.<sup>16 23 24</sup> Additionally, stigma  
42  
43 and discrimination against sex workers are significantly amplified in settings where sex  
44  
45 work is criminalized, and further reduce sex workers ability to access police protections  
46  
47 or health and social support services.<sup>23 25</sup>

### **'Demand Criminalisation'**

Over the past decade there has been increased interest by a number of higher income countries to attempt to eradicate prostitution through 'demand criminalisation', which criminalizes the purchase, but not the selling, of sexual services. Sweden, Norway, Iceland, and most recently France, opted for 'demand criminalisation', despite the lack of evidence supporting this legal framework. Similarly, the European Union has also recently voted in favour of implementing this approach.<sup>26</sup> 'Demand criminalisation' was first implemented in Sweden in 1999. The primary objective of the law is to eradicate prostitution by eliminating demand. However, evidence from Sweden, indicates that the law has been unsuccessful in meeting this objective.<sup>27</sup> Instead, a number of unintended consequences have been reported – namely, that it drives sex workers and clients underground to more clandestine locales, and is difficult to enforce due to the unwillingness of sex workers to testify against their clients.<sup>28 29</sup>

### **The Canadian Context**

Canada is at a critical time in the evolution of its legal response to sex work. In December 2013, Canada's highest court, the Supreme Court of Canada, unanimously struck down Canada's core prostitution laws, deeming them unconstitutional for violating sex workers' constitutional rights, including the ability to protect themselves from violence, abuse and HIV/STI infection.<sup>30</sup> The three laws struck down included prohibitions on communicating in public for the purpose of prostitution (sex workers or clients), operating a bawdy house, and living off the avails of prostitution. Similar to the United Kingdom and other commonwealth countries, the Canadian Criminal Code has

1  
2  
3 never criminalized the buying or selling of sex *per se*, however the laws prohibit virtually  
4  
5 every other aspect of sex work, making it effectively impossible to engage in sex work  
6  
7 legally. The hypocrisy of the criminalized prostitution laws and the unintended harms on  
8  
9 sex workers' safety, health, and human rights were a critical reason for the Supreme  
10  
11 Court of Canada decision.<sup>30</sup> The Court suspended the decision for one year to provide  
12  
13 the Canadian government time to respond; by either removing the struck down laws  
14  
15 from the Criminal Code (and thus decriminalize sex work); or bringing the laws  
16  
17 governing prostitution in line with the decision. Following the decision, the Canadian  
18  
19 government has moved quickly towards calling for criminalizing the purchase of sex,<sup>31</sup>  
20  
21 despite a lack of evidence that this change would address the harms associated with  
22  
23 criminalized and quasi-criminalized approaches of regulating prostitution.  
24  
25  
26  
27  
28  
29

### 30 31 **New Sex Work Enforcement Policy in Vancouver, Canada**

32  
33 Vancouver, Canada provides a unique opportunity to evaluate the potential  
34  
35 impact of laws and policies that criminalize sex buyers (clients). In January 2013, the  
36  
37 Vancouver Police Department (VPD) officially adopted new sex work enforcement  
38  
39 guidelines that shifted the focus in policing sex work away from arresting or pressing  
40  
41 charges against sex workers. These sex work enforcement guidelines emerged after two  
42  
43 decades of tremendous violence and murder of street-based sex workers and strong  
44  
45 pressure from sex work and other community organizations, legal experts, and  
46  
47 academic researchers calling for reforms to local policing practices to better protect,  
48  
49 rather than increase harm, isolation and risk of violence to sex workers.<sup>32</sup> The sex work  
50  
51 policing guidelines set out a strategy to 'open communication' with sex workers and  
52  
53  
54  
55  
56  
57  
58  
59  
60

1  
2  
3 prevent violence against sex workers through prioritizing their safety over enforcement  
4  
5 measures such as arrest.<sup>33</sup> However, the policing guidelines did not address changes in  
6  
7 enforcement of clients. In fact, on their website the VPD confirms that they continue to  
8  
9 “target both pimps and customers, in locations where the impact of the sex trade has  
10  
11 become unacceptable”.<sup>34</sup> The result is that as of January 2013, Vancouver has been a  
12  
13 de facto ‘demand criminalisation’ environment.  
14  
15  
16  
17

18  
19 Therefore, the objectives of this study are to evaluate how a new local  
20  
21 enforcement strategy that targets clients, but not sex workers, shape sex workers’  
22  
23 interactions with police and negotiation of their working conditions and sexual  
24  
25 transactions with clients, with a particular focus on protections from violence and  
26  
27 HIV/STI infections.  
28  
29

## 30 31 **METHODS**

32  
33 This study is situated within a larger NIH-funded longitudinal qualitative and  
34  
35 ethnographic research project investigating the structural and physical, social and policy  
36  
37 features of work environments shaping sex workers’ sexual health, violence, and access  
38  
39 to care in Vancouver, Canada. The research builds on longstanding partnerships and a  
40  
41 community advisory board with sex worker, community, policy and health stakeholders  
42  
43 since 2004, and runs alongside a sister project known as AESHA (An Evaluation of Sex  
44  
45  
46  
47

48  
49 Workers’ Health Access). The AESHA cohort is a community-based longitudinal study of  
50  
51 over 800 sex workers with bi-annual follow-up, focused on evaluating the physical,  
52  
53 social and policy environments shaping sexual health, violence, HIV vulnerability and  
54  
55  
56  
57  
58  
59  
60

1  
2  
3 access to care among sex workers.<sup>35</sup> The research and outreach team include both  
4  
5  
6 experiential and non-experiential staff.  
7

8  
9  
10  
11  
12  
13  
14  
15  
16  
17  
18  
19  
20  
21  
22  
23  
24  
25  
26  
27  
28  
29  
30  
31  
32  
33  
34  
35  
36  
37  
38  
39  
40  
41  
42  
43  
44  
45  
46  
47  
48  
49  
50  
51  
52  
53  
54  
55  
56  
57  
58  
59  
60  
This study draws on ethnographic field work of street-based sex work scenes and qualitative semi-structured interviews with street-involved sex workers about their working conditions, interactions with police, and negotiations of health and safety with clients, in the City of Vancouver, Canada over 11 months (January-November 2013), following the implementation of the new sex work enforcement guidelines by the Vancouver Police Department (VPD) in January 2013. Qualitative and ethnographic data were triangulated with sex work-related violence prevalence data from the AESHA cohort pre and post policy implementation and publicly available police statistics that report on prostitution related criminal code offences in the City of Vancouver.<sup>36</sup>

31  
32  
33  
34  
35  
36  
37  
38  
39  
40  
41  
42  
43  
44  
45  
46  
47  
48  
49  
50  
51  
52  
53  
54  
55  
56  
57  
58  
59  
60  
The lead author (AK) and co-author (JC) conducted more than 40 hours of ethnographic observation within known street-based sex work strolls in the City of Vancouver to assess level of police presence; shifts in working areas; and police, sex worker and client interactions. All ethnographic observations were conducted within the context of regular weekly AESHA outreach shifts, which included provision of harm reduction supplies, food and referrals to social and health supports. Observation sessions lasted three to five hours and took place during peak hours of sex work activity between 10pm and 3am. AK and JC recorded brief fieldnotes in a research log during the observation sessions and elaborated on them after each observation outing.

54  
55  
56  
57  
58  
59  
60  
Interview participants were recruited through purposive sampling from the longitudinal cohort (AESHA), and aimed to reflect variation in demographics (e.g., age,

1  
2  
3 ethnicity, gender) and work environments (e.g., geographic neighbourhoods; variation  
4  
5 in street and off-street solicitation and transaction spaces). Eligibility criteria for the in-  
6  
7 depth interviews included: 1) current sex work defined as exchanged sex for money in  
8  
9 the last 30 days in City of Vancouver; 2) identifying as cis- or transgender women and 3)  
10  
11 aged 18 years or older. While the larger qualitative and ethnographic research and  
12  
13 AESHA projects focus on a diversity of street and off-street (e.g., indoor, online) sex  
14  
15 work environments, this specific study aimed to examine the experiences of street-  
16  
17 involved sex workers (i.e., those soliciting and/or servicing on the street) given  
18  
19 substantial data that criminalisation and enforcement disproportionately target this  
20  
21 segment of the sex industry.<sup>10 13 14</sup> It should be noted that even within this context,  
22  
23 many street-involved sex workers worked in both street and off-street venues, including  
24  
25 online and indoor informal and formal venues (see results).  
26  
27  
28  
29  
30  
31  
32

33  
34 The 31 semi-structured interviews were conducted by two experienced  
35  
36 qualitative interviewers (CT, AK) and facilitated by an interview guide encouraging broad  
37  
38 discussions of working conditions, police presence and interactions, and negotiation of  
39  
40 health and safety in transactions with clients, post-VPD policy implementation (January  
41  
42 2013). The interview guide was developed based on existing knowledge of the research  
43  
44 team and in collaboration with our sex worker, community and policy partners. We  
45  
46 conducted all interviews at one of two field offices in the City of Vancouver. Interviews  
47  
48 lasted between 45 and 90 minutes, were audio-recorded, transcribed verbatim and  
49  
50 checked for accuracy. All participants provided informed consent and were  
51  
52 remunerated with a CAD \$30 honorarium for their time, expertise and travel. The study  
53  
54  
55  
56  
57  
58  
59  
60

1  
2  
3 holds ethical approval by the Providence Healthcare/University of British of Colombia  
4  
5  
6 Research Ethics Board.  
7

8  
9 Interview transcripts and ethnographic data were analyzed using thematic  
10  
11 analyses to examine sex worker's interactions with police and negotiation of their  
12  
13 working conditions and sexual transactions with clients, including protections from  
14  
15 violence, abuse, and HIV/STI infections, post-policy implementation. All textual data  
16  
17 were analyzed using an inductive and iterative process facilitated by the qualitative  
18  
19 analysis software ATLAS.TI V7. The initial coding framework was based on key themes  
20  
21 reflected in the interview guide, participants' accounts and fieldnotes. More  
22  
23 conceptually-driven substantive codes (e.g., trust, discrimination, control over sex work  
24  
25 transactions) were then applied. Verbatim narratives are reported using pseudonyms  
26  
27 assumed by sex workers to ensure anonymity. [Longitudinal quantitative data on  
28  
29 prevalence of workplace physical and sexual violence among sex workers from the  
30  
31 AESHA cohort were analyzed by two 8month time-periods \(pre-policy, May 1- December  
32  
33 31, 2012; vs. post-policy implementation, January 1-August 31, 2013\). Analysis was  
34  
35 conducted using SAS statistical software version 9.2 and restricted to sex workers in  
36  
37 AESHA who solicited and/or serviced clients on the street. Descriptive frequencies and  
38  
39 bivariate analyses were analyzed to test for statistical significance by time period of VPD  
40  
41 policy implementation \(pre vs. post\) and reported using odds ratios \(OR\), 95%  
42  
43 confidence intervals \(CIs\) and p-values.](#)  
44  
45  
46  
47  
48  
49  
50  
51  
52  
53  
54  
55  
56  
57  
58  
59  
60



## RESULTS:

### Sample characteristics

The sample for semi-structured interviews included 26 cisgender and 5 transgender women sex workers (total n=31). The mean age of participants was 38 years (range: 24-53). Overall, 21 identified as Caucasian, 8 were of Aboriginal ancestry and 2 participants were of other visible minorities. All participants had experience with street solicitation. The majority (77%, n= 24) reported street solicitation as their primary way of connecting with clients, while others (23%, n= 7) primarily used phone/text solicitation to connect with clients. Just over half (55%, n= 17) primarily serviced clients in vehicles or outdoor public spaces, while 45% (n= 14) primary serviced clients in informal indoor venues (e.g., hotels, client's place, or their home).

### Sex Workers' Experiences with New Sex Work Enforcement Guidelines

Sex workers' narratives and ethnographic observations indicated that while police sustained a high level of visibility they eased charging or arresting sex workers and showed increased concern for their safety. Most sex workers experienced a gradual change in policing over a number of years rather than an abrupt change in policing with the publication of new sex work enforcement policy in January 2013. Some women felt that they were interacting less with police as long as they solicit clients in two separate areas of the city that function as de facto sex work tolerance zones.

*There's more [police] presence. There's not very many more interactions. Before the interactions were always there. They'd come and pull you right outta car and, like push you over. They'd get away with it back then. You know. But now it's like they don't, interact.* - Anna, Transgender woman sex worker

1  
2  
3  
4 The vast majority of participants, regardless of gender, ethnicity and primary place  
5 of solicitation, reported that their interactions with police when soliciting sex work  
6 clients are more positive and generally focus on their safety.  
7  
8  
9

10  
11  
12  
13 *Every time they pull you over it's strictly to ask you how you're doing, how*  
14 *things are. If there's any bad dates you want to report.* Fiona, Cisgender  
15 woman sex worker  
16

17  
18  
19 While participants in this study viewed this change as positive, the continued police  
20 enforcement of clients severely limited any positive impact of this change on their  
21 overall working conditions, risks for violence, abuse, or negotiation of sexual risk  
22 reduction with clients.  
23  
24  
25  
26  
27

### 28 29 **Continued Police Enforcement of Sex Buyers (Clients)**

30  
31  
32 Sex workers' narratives indicated that while police tolerated sex work related  
33 activities in two separate de facto sex work zones, clients continued to be at risk of  
34 police scrutiny. Indeed, according to official police statistics sex work-related Criminal  
35 Code offences rose from an all time low of 47 in 2012 to 71 in 2013 (see Figure1).<sup>36</sup> This  
36 represents a 51 percent increase in prostitution-related offences since the  
37 announcement of the VPD sex work enforcement guidelines in January 2013.  
38  
39  
40  
41  
42  
43  
44  
45

46  
47 Figure 1: Prostitution-Related Criminal Code Offenses Vancouver 2010-2013<sup>36</sup>  
48  
49  
50  
51  
52  
53  
54  
55  
56  
57  
58  
59  
60

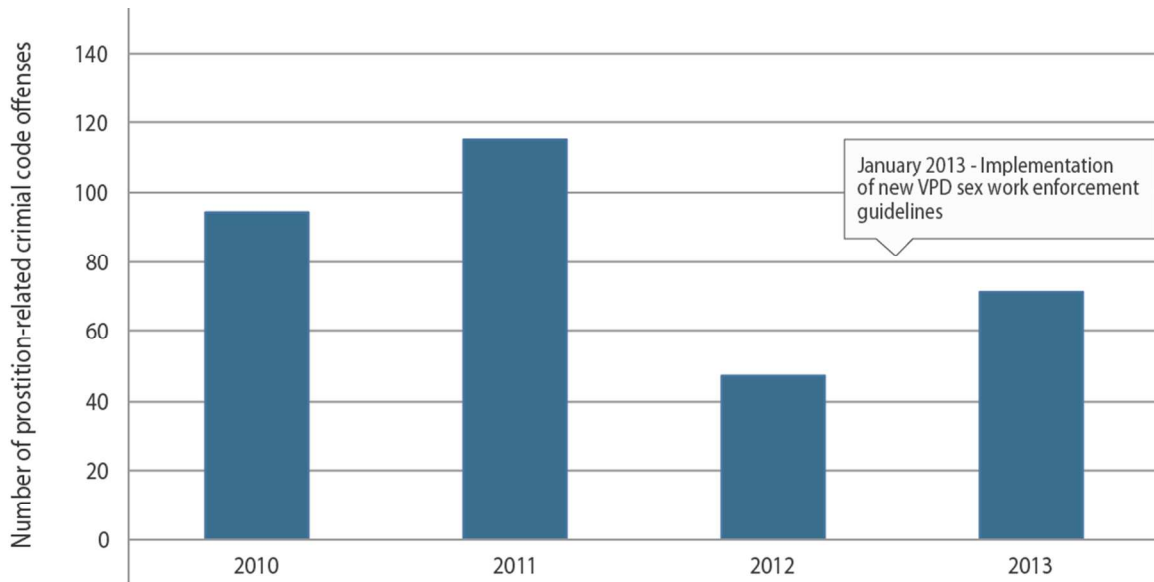

Unfortunately, no statistics are available regarding the proportion of sex workers versus clients who were charged. However, participants' accounts indicate that the 51 percent rise in prostitution related offences likely reflects an increase of enforcement efforts targeting clients, as the majority of sex workers felt that their clients were currently the main targets of police (consistent with messaging on the VPD website)<sup>34</sup>.

*I think the Johns or clients that I have probably worry the most about police.*  
- Melissa, Cisgender woman sex worker

*[Clients] do get stopped. A couple of my regulars they've been chased off the street, they're not allowed to come downtown anymore. Down here they're bad for that. I guess, it's more so not the girls they go after - it's the guys.*  
- Maria, Cisgender woman sex worker

Most sex workers reported that clients are at risk of being pulled over by police even before actually negotiating a sex work transaction by circling around known sex work areas. However, sex workers' narratives indicated that the riskiest time for attracting police attention was the moment when women entered the vehicle of a

1  
2  
3 prospective client. In some cases, police used non-prostitution related charges (e.g.  
4  
5 trafficking violations) as a means to pull over the vehicle and target clients. Women  
6  
7 expressed that while they used to be the main target of police, the more recent  
8  
9 experiences generally ended with the police allowing sex workers to leave, often  
10  
11 without checking for outstanding warrants. Clients were being detained by police, and  
12  
13 issued either a warning or a fine.  
14  
15  
16  
17  
18  
19

20 *Right now when they [police] pull you over they let you, the girl go, keep the*  
21 *guy. Before they would separate you and then make a big investigation. Try*  
22 *to catch you in lies or intimidate you and make you nervous and try to say*  
23 *you can get more charges. – Ruth, Transgender woman sex worker*  
24

25 *One of my regulars, they gave him a five-hundred dollar disturbing the peace*  
26 *ticket. And they didn't run my name through. They just come out of nowhere,*  
27 *right? [Yeah, was it just for you getting in the car?] Yeah, I guess that was*  
28 *just the punishment, you know what I mean? So, I saw the guy a few times*  
29 *afterwards and he was saying he was going to fight and wanted me to be a*  
30 *witness and then I guess he thought afterwards, geez no. He told me he paid*  
31 *it online, I guess he has a family and that and he just wanted it to go away.*  
32  
33 - Jessica, Cisgender woman sex worker  
34  
35

### 36 **Criminalisation of Clients: Limited Effect on Deterrence of Sex Work**

37  
38 Sex workers reported that when police target clients, some clients are  
39  
40 deterred from purchasing sex on the street.  
41  
42

43  
44 *No one will pull over if there's a car, a police car near you. It's, like, if they*  
45 *see the lights they'll disappear. You can see the difference in traffic. They're*  
46 *just gone. – Selina, Transgender woman sex worker*  
47  
48

49 Some sex workers, however, felt that rather than preventing clients from purchasing  
50  
51 sex, police presence resulted in potential clients seeking out sex workers in a different  
52  
53 area of the city.  
54  
55  
56  
57  
58  
59  
60

1  
2  
3  
4  
5  
6  
7  
8  
9  
10  
11  
12  
13  
14  
15  
16  
17  
18  
19  
20  
21  
22  
23  
24  
25  
26  
27  
28  
29  
30  
31  
32  
33  
34  
35  
36  
37  
38  
39  
40  
41  
42  
43  
44  
45  
46  
47  
48  
49  
50  
51  
52  
53  
54  
55  
56  
57  
58  
59  
60

*Once the guy that's looking for a woman sees a cop, in the neighbourhood, he's scared. So he'll go to another neighbourhood and find another woman somewhere. –Rebecca, Cisgender woman sex worker*

For participants in this study, the reality of living in poverty, and marginalization often combined with illicit substance use, meant that even when police target clients, sex workers report that they continue to work for the obvious reason of earning an income. Ethnographic observation and sex worker narratives indicated that police enforcement of clients had no effect on deterring women from engaging in street-based sex work (Table 1). Indeed, for many participants the enforcement of clients forced them to spend longer hours on the street to earn an income. Thus contrary to the objectives of criminalising clients, impeding sex workers ability to engage with potential clients did not result in less street-based sex work for these women. Instead, having access to fewer clients meant it was harder to earn an income and forced sex workers to accept clients or services (e.g. sex without a condom) that they would otherwise reject due to safety concerns, this directly increased risks for physical and sexual violence and poor health, including HIV/STI infection.

Table 1: **Criminalisation of Clients: Limited Effect on Deterrence of Sex Work Sex Worker Voices**

While they're going around chasing johns away from pulling up beside you, I have to stay out for longer [...] Whereas if we weren't harassed we would be able to be more choosy as to where we get in, who we get in with you know what I mean? Because of being so cold and being harassed I got into a car where I normally wouldn't have. The guy didn't look at my face right away. And I just hopped in cause I was cold and tired of standing out there. And you know, he put something to my throat. And I had to do it for nothing. Whereas I woulda made sure he looked at me, if I hadn't been waiting out there so long. – Violet, Cisgender woman sex worker

It pisses me off that they [the police] are there because basically what it comes down to is the shortest time that I'm out there, the shorter I'm on the street and the better I'm paid. But you [police] stand out there and you fuck up my business and scare away my dates. The longer I'm out there my chances of getting sick, raped, robbed, beat up whatever are greater so. Lisa, Cisgender woman sex worker

Of course, 'cause no one's [clients] going to stop with them there. I'm not going to go home. So they're [police] not really doing anything, they're just keeping me out there longer. Really, if they would just leave me alone, I'd get a date and go home and they wouldn't see me. But that way I end up staying out there for hours 'cause I'm not going home empty-handed so I don't know what they think they're really achieving. Charlene, Cisgender woman sex worker

### Criminalisation of Clients: Severely limits sex workers' safety strategies

Our findings indicate that criminalisation and policing strategies that target clients reproduce the harms, created by broader criminalisation of sex work. Analyses of prevalence of workplace physical and sexual violence against street-based sex workers in Vancouver indicated no statistically significant change in violence rates following policy implementation (OR=1.05, 95%CI:0.70-1.58; p=0.804). Specifically, in the 8-month period post-policy implementation, 24.6% (58/236) of sex workers experienced work-related physical and sexual violence (as compared to 23.7% (65/275) interviewed in the

1  
2  
3  
4  
5  
6  
7  
8  
9  
10  
11  
12  
13  
14  
15  
16  
17  
18  
19  
20  
21  
22  
23  
24  
25  
26  
27  
28  
29  
30  
31  
32  
33  
34  
35  
36  
37  
38  
39  
40  
41  
42  
43  
44  
45  
46  
47  
48  
49  
50  
51  
52  
53  
54  
55  
56  
57  
58  
59  
60

8months pre-policy in 2012), of whom 22.0% reported physical abuse and 14.0% had been raped post-policy implementation (compared with 19.3% and 15.6% pre-policy, respectively).

Qualitative analysis of the sex workers' narratives, reveal three key mechanisms by which criminalisation and police targeting of clients continued to severely impacts sex workers' ability to negotiate their working conditions and transactions with clients, including protections from violence and HIV/STI infections.

### *1. Inability to Screen Clients and Negotiate Terms of Sexual Transactions*

Sex workers' narratives emphasized that, in the context where clients continue to be police targets, it remains in both the clients' and sex workers' interest not to get pulled over by police. Therefore, sex workers continue to be forced to severely limit or forego screening of prospective clients or negotiating the terms of sex work transactions (e.g. fee, sexual services, condom use) before getting into a vehicle (Table 2). In addition to entering a prospective client's car swiftly, participants reported that in order to reduce the risk of attracting police attention, potential clients point them to an alleyway away from the main street with limited lighting to allow them to enter the vehicle undetected by police (Table 2). Policing of clients thus directly undermines sex workers ability to **screen potential clients** including, checking "bad date" sheets for past violent perpetrators, detecting possible weapons, or intoxication; and **negotiating the terms of the sexual transactions**, including where the date will take place, the fee and types of sexual services, and use of condoms, before entering a vehicle. These practices of screening and negotiating the terms of transactions have both been well documented as

critical to sex workers' ability to control their health and safety, including protections from violence, abuse and HIV/STI infection.<sup>15 17 19</sup>

**Table 2: Criminalisation of Clients: Severely Limits Sex Workers' Safety Strategies  
Sex Worker Voices**

*Well, usually I try to hop in the car right away, right? 'Cause I don't want to get seen talking, in case a cop drives by or something. [...] I'll hop in and then we can like negotiate and talk, you know? First I like to make sure that nobody's around or following or anything. – Maria, Cisgender woman sex worker*

*To avoid police they [clients] drive by couple times and they point. They point at like a place where nobody's driving by. So they point and that means to go follow them with the vehicle and then they'll stop [...] They go somewhere different in an alley or something. They just leave like the window open and then you just, get in. [But would you talk to them first?] Um no well when they're trying to avoid police like that you just get into the vehicle, right. – Jane, Transgender woman sex worker*

*Sometimes the guy will drive up and just sort of wave or point to go down the alley or something like that somewhere else were he can pick me up. [How does that affect your safety?] You never know who it is right? And you can't really see his face, can't really see anything they could have a gun in their hand or. You know what I mean they could be a little bit drunk or something if you can't really see them very clearly, you know? And you don't you can't say hi or whatever before you get in. You have to just hurry up before the cops come. – Laura, Cisgender woman sex worker*

Prior to the VPD policy, police frequently engaged in undercover operations in order to target sex workers and their clients. This practice continues to shape sex work transactions and, in the context of sustained criminalisation of clients, undercover operations negatively affect the ability of sex workers to screen their clients or negotiate the terms of sexual transactions. Participants' accounts indicated that, rather than trying to assess the safety of entering a vehicle of a prospective client and negotiating the terms of the transaction, the initial interaction with a client is dictated by determining whether the sex worker is an undercover police officer. This usually



1  
2  
3 involves both the client and sex worker touching each other, due to the belief that  
4  
5  
6 undercover police officers are not allowed to engage in bodily contact without  
7  
8  
9 identifying themselves as police.

10  
11 *Normally when you get picked up, you go: Are you a cop? No, are you?*  
12 *Nope. Prove it. And you, touch each other just to make sure, right? 'Cause*  
13 *cops can't do that. So that's the rule, if you're undercover you can't touch*  
14 *someone. Normally, a guy'll touch my boob, I'll touch his crotch. Or he'll*  
15 *touch my crotch, I'll touch his, right? That's just to verify okay, you're not a*  
16 *cop, right? Martha, Cisgender woman sex worker*

## 19 2. Displacement to Isolated Areas

20  
21  
22 Sex workers' accounts further indicated that, in the context of continued  
23  
24 criminalisation of clients, many clients demand on engaging in sex work  
25  
26 transactions away from known sex work areas where there is heightened police  
27  
28 presence. Participants reported that being alone with clients in often unknown,  
29  
30 secluded, industrial areas where there is little chance for help puts women at  
31  
32 increased risk of violence and rape and reduces their ability to negotiate the  
33  
34 transaction on their terms, elevating their risks for client condom refusal and thus  
35  
36 HIV/STI infection (Table 3).  
37  
38  
39  
40  
41  
42  
43  
44  
45  
46  
47  
48  
49  
50  
51  
52  
53  
54  
55  
56  
57  
58  
59  
60

**Table 3: Criminalisation of Clients: Displaces Street-Based Sex Work to Isolated Areas  
Sex Worker Voices**

*Clients worry [about police]. Like for me I don't like going outside the neighborhood, right. Cause, you know what about if the guy turns out to be an asshole. [...] That's how I do loose dates by not going where I'm supposed to cause they're afraid of cops. [So do you turn dates down sometimes?] Yeah sometimes but not all the time cause when I'm I'm really in need of money I will maybe try and go. But then I just try and get a good feel of them first. - Jane, Transgender woman sex worker*

*Clients are worried about police. To avoid police they wanna move to a different area. I don't want to go out of my zone right. [...] Once you get out there, like you know their turf so it's harder for me cause it's their comfort zone or, so hey act differently, you know what I mean. Yeah it never ends up good. - Sandra, Cisgender woman sex worker*

*We try to get away from the area as quick as possible. You know. So that we're not in the area. Right. The farther away you get from [name of sex work stroll], the better it is. You're not gonna get pulled over right? I'm just a little nervous as it's so quiet down there by [industrial area]. - Violet, Cisgender woman sex worker*

### 3. Inability to Access Police Protections

The main objective of the police enforcement guidelines is to foster more trusting relationships between sex workers and police and prioritize the safety of sex workers in any police interactions. A striking feature of many sex workers' accounts was that police inquiring about their safety was perceived as a nuisance at best, and a form of police harassment, at worst. In a context where clients continue to be police enforcement targets, sex workers' narratives indicated it is difficult for police to fulfill their stated objective of prioritizing the safety of sex workers. Even conversations between sex workers and police can have a destabilizing effect, as any police interactions may scare away clients and have the potential to raise suspicion that a sex worker might be an undercover police officer (Table 4).

Similarly, an important aspect of sex workers' safety is the ability to report theft, violence and sexual harassment to police. Currently however, the majority of sex workers voiced reservations about reporting such incidents to police. Many sex workers, drawing on historic discrimination and maltreatment by police, doubted that police would take their complaints seriously and voiced that the continued criminalisation of clients constituted a significant barrier to reporting violence to police as any information about where they work could be used to refine enforcement strategies targeting clients.

**Table 4: Criminalisation of Clients: Prevents Access to Police Protections  
Sex Worker Voices**

Destabilizing effect of police safety checks

*It's a drag, you know? I'm out there to make money, not waste twenty minutes talking to them [police]. And then I'm talking to them and half the dates that see me talking to them now think maybe I'm a cop, so they don't wanna stop, now they know the cops are around, they don't wanna stop, or they wonder what I've done to attract the cops so they don't wanna stop, like, it's just a hassle, you know? – Charlene, Cisgender woman sex worker*

*If the clients see you talking to the cops then they don't pick you up. [When police talk to me] they're respectful but they know that they're wasting my time so. They can do whatever they want. They're fucking up everything. – Selina, Transgender woman sex worker*

Reporting violence to police

*No I would never go to the cops [to report violence]. Because it makes it look like, we shouldn't be out there like we can't take care of ourselves. I feel like if I went and reported some of these things that it might do more harm to the working profession than do good. So I don't do that. Basically we have to fend for ourselves. They don't really like us to begin with. – Rose, Cisgender woman sex worker*

*I've needed the police's help with bad dates and they've done absolutely nothing. The fact that it's not legalized you kinda can't do it, you know. – Charlene, Cisgender woman sex worker*

## DISCUSSION

These findings suggest that criminalisation and policing strategies that target clients reproduce the harms, created by the criminalisation of sex workers, in particular, risks for violence and abuse. Contrary to the goal of criminalizing clients, our findings suggest that this approach has limited to no effect on preventing street-based sex work and did not reduce the prevalence of sex work related violence. Our analysis provides strong empirical evidence of the lived experience of sex workers indicating that the continued criminalisation and policing of clients, even when sex workers are no longer police targets, profoundly impacted sex workers ability to negotiate their working conditions and health and safety. Collectively, this research suggests that displacement to isolated areas and inability to screen clients or negotiate the terms of sexual transactions directly reduced sex workers' ability to refuse unwanted clients or services (e.g. sex without a condom), thereby increasing risks for physical and sexual violence and HIV/STI infection. In addition, despite improved relations between sex workers and police, continued police targeting of clients created mistrust of police and severely limited sex workers ability to access police protections.

In a legal environment where clients remain the target of enforcement, our findings indicate a shared interest of sex workers and clients to remain undetected by police, forcing sex workers to rush or completely forgo client screening, and pushing sex workers to work in secluded areas away from street lighting and other passers by. These findings reflect earlier epidemiological and social science research that have consistently demonstrated a direct correlation between criminalisation and policing of

1  
2  
3 street-based sex work and elevated odds of physical violence and rape, as well as  
4  
5 HIV/STI infection through client condom refusal.<sup>6 10 11 15 5 18</sup> This work has identified  
6  
7 screening of prospective clients as essential to allowing sex workers to take safety  
8  
9 precautions, including agreement on where the transaction will take place, checking  
10  
11 'bad date' reports describing the personal characteristics and/or vehicle of known  
12  
13 violent perpetrators, and checking for the presence of weapons and intoxication.<sup>12</sup> In  
14  
15 addition to screening, negotiating the terms of sexual transactions with clients before  
16  
17 entering the vehicle, including the fee, and types of sexual services, remains critical for  
18  
19 sex workers to negotiate the terms of their work, and avoid risky sexual encounters (e.g.  
20  
21 unprotected sex). Without the opportunity to screen clients or safely negotiate the  
22  
23 terms of sexual services, research has shown that sex workers face increased risks of  
24  
25 violence, abuse and HIV/STI infection.<sup>15 17 18 37 38</sup> Our findings resonate with evaluations  
26  
27 from Sweden that reported, since the implementation of the law that criminalizes  
28  
29 clients, there had been an increase in violence experienced by sex workers, which was  
30  
31 linked to greater risk taking in client selection due to the necessity of rushed negotiation  
32  
33 with potential clients.<sup>28 29</sup>

34  
35  
36  
37  
38  
39  
40  
41  
42  
43  
44  
45  
46  
47  
48  
49  
50  
51  
52  
53  
54  
55  
56  
57  
58  
59  
60  
Police undercover operations further reduce the safety of sex workers as initial interactions with clients focus on determining that sex workers are not undercover police officers, rather than allowing time to negotiate the details of the transaction, including condom use, type of service and price. The negative impact of undercover police operations on the safety and health of sex workers is of note as it is one of the main enforcement strategies available to police in a context where clients are

1  
2  
3 criminalized. Sex workers also described how police used other non-prostitution related  
4  
5 offenses (e.g. administrative laws such as trafficking violations, public nuisance) to  
6  
7 target sex workers and clients.  
8  
9

10  
11 The results of this study further highlight that in a context where sex buyers are  
12  
13 criminalized, sex workers continue to be displaced, as many clients insist on engaging in  
14  
15 sex work transactions away from police scrutiny. Being displaced to unknown, secluded,  
16  
17 industrial areas where there is little chance of receiving help when needed is linked to  
18  
19 increased risk of violence and rape and reduces sex workers' ability to negotiate the  
20  
21 transaction on their terms, including condom use.<sup>15 17 37 38</sup>  
22  
23  
24  
25

26 Evidence both in Canada and globally has consistently shown that  
27  
28 criminalisation of sex workers prevents sex workers from accessing police protection,  
29  
30 whereby police become adversaries as opposed to safety mechanisms.<sup>6 9 10 22 29</sup> A clear  
31  
32 example is the case of the detrimentally flawed police investigation of the serial murder  
33  
34 of the Missing Women in Vancouver, Canada; where criminalisation, and historic  
35  
36 discrimination by police were found to be a key factors in putting police in an adversarial  
37  
38 relationship with sex workers.<sup>32</sup> In addition to the deeply engrained stigma of sex work  
39  
40 and the historic police discrimination of sex workers, our findings indicate that when sex  
41  
42 work clients are police enforcement targets, many sex workers remain reluctant to seek  
43  
44 police protection. Sex workers worry about disclosing details of how they operate and  
45  
46 where they work for fear police may use this information to refine their enforcement  
47  
48 strategies that target sex work clients. This study also identified that in a context of  
49  
50 continued police enforcement of sex work clients, even conversations with police about  
51  
52  
53  
54  
55  
56  
57  
58  
59  
60

1  
2  
3 safety can have a destabilizing effect, as any police interactions scare away clients and  
4  
5 have the potential to rise suspicion a sex worker might be an undercover police officer  
6  
7 or a police informant. This policing practice deters women from interacting with police  
8  
9 and undermines the main objective of the VPD policing guidelines, which is to prioritize  
10  
11 the safety of sex workers. In addition to scaring away potential clients, and thus  
12  
13 potentially reducing the income women rely upon, being labelled as a police informant  
14  
15 can place a woman at the bottom of street hierarchy and may place her at severe risk  
16  
17 for violence.  
18  
19  
20  
21  
22

23 While rhetorically powerful and politically appealing, there is a fundamental  
24  
25 conceptual inconsistency in policies that criminalize clients and purport to prioritize the  
26  
27 safety of sex workers. In its original incarnation, the model of criminalizing clients in  
28  
29 Sweden was not designed to increase the safety of women *in* sex work; rather its goal  
30  
31 was to eradicate prostitution and increase the safety of women who exit sex work.  
32  
33 Indeed, in Sweden, the government explicitly condoned the increased risks that  
34  
35 marginalized sex workers were exposed to by arguing that any adverse effects on  
36  
37 women who remain in sex work were outweighed by the message of the law that  
38  
39 prostitution is not tolerated.<sup>28</sup> Our findings indicate that policies that criminalize clients  
40  
41 are, in practice, not reconciled with policies that aim to prioritize the safety of sex  
42  
43 workers, such as outlined in VPD sex work enforcement guidelines. Indeed, the findings  
44  
45 of our study indicate that despite police efforts to prioritize the safety of sex workers,  
46  
47 when clients remain enforcement targets, sex workers continue to be at increased risk  
48  
49 for physical and sexual violence and perceive police concern for their safety as a form of  
50  
51  
52  
53  
54  
55  
56  
57  
58  
59  
60

1  
2  
3 nuisance and harassment.  
4

5  
6 Street-involved sex workers, those living in poverty, Aboriginal sex workers and  
7  
8 transgender sex workers have historically been exposed most directly to the negative  
9  
10 effects of restrictive policing and criminalized sex work laws.<sup>14 15 28</sup> Evidence from  
11  
12 Sweden indicates that criminalizing clients negatively affected the working conditions  
13  
14 and safety of all segments of sex workers by further pushing them underground.  
15  
16 However, marginalized sex workers who solicit and/or service on the street were most  
17  
18 negatively impacted by the criminalisation of clients, as they may not have the  
19  
20 resources to reduce police scrutiny by advertising online, or be contacted by phone.<sup>28</sup>  
21  
22 Due to a less developed welfare system in Canada, and the larger population of street-  
23  
24 based sex workers compared to Sweden, the negative impact of demand criminalisation  
25  
26 on sex workers health and safety will likely be even more pronounced in the Canadian  
27  
28 context.  
29  
30  
31  
32  
33  
34  
35

36 The very existence of specific laws to regulate sex work speaks to the stigma  
37  
38 associated with sex work and the link between sex work legislation and morality.<sup>39</sup> In  
39  
40 Canada, as in most settings globally, there are already laws in place for targeting various  
41  
42 forms of exploitation and nuisance that may arise in the context of sex work, such as  
43  
44 public disturbance, indecent exhibition, coercion, sexual assault, trafficking persons,  
45  
46 extortion, and kidnapping. As such, given the negative impact of criminalized sex work  
47  
48 laws and enforcement practices, our findings lend further support to calls for the full  
49  
50 decriminalisation of sex work in Canada, consistent with international guidelines by  
51  
52 global policy bodies.<sup>1 29</sup>  
53  
54  
55  
56  
57  
58  
59  
60



1  
2  
3  
4  
5  
6  
7  
8  
9  
10  
11  
12  
13  
14  
15  
16  
17  
18  
19  
20  
21  
22  
23  
24  
25  
26  
27  
28  
29  
30  
31  
32  
33  
34  
35  
36  
37  
38  
39  
40  
41  
42  
43  
44  
45  
46  
47  
48  
49  
50  
51  
52  
53  
54  
55  
56  
57  
58  
59  
60

New Zealand, and parts of Australia, have decriminalized sex work. In New Zealand, workplace health and safety standards have been established in consultation with sex workers, and sex workers can bring employment complaints to governing bodies.<sup>27</sup> The New Zealand Prostitution Reform Act enacted in 2003 treats sex work as any other business, regulating its commercial practice through standard employment Health and Safety regulations; regulating the location of commercial sex establishments through zoning by-laws; and specifying the health and safety obligations of managers and workers.<sup>39</sup> Although decriminalisation is by no means a panacea, there is significant evidence to suggest that, in New Zealand, it has created improved working conditions for sex workers, including increased ability to report violence to police.<sup>40</sup> The removal of criminalized and enforcement-based approaches to sex work will also help to support access and implementation of other health and social interventions not currently available to the most criminalized, street-involved sex workers; such as safer indoor work and housing spaces, integrated health and social welfare supports, substance use prevention and treatment, and opportunities for alternative employment for those sex workers who chose to transition out of sex work.

This study has limitations. The lived experiences of participants represented in this study reflect street-involved sex workers living in poverty and may not be representative of the experiences of sex workers in other segments of the industry. However, given that evidence has consistently shown that criminalisation and policing disproportionately target street-based sex workers, we feel these narratives provide critical evidence of the health and safety harms of such a policy.

1  
2  
3  
4 In summary, this study suggests that enforcement strategies that target sex work  
5  
6 clients reproduce the harms related to criminalized and quasi-criminalized approaches  
7  
8 to the regulation of sex work. This empirical research clearly demonstrates that ~~the~~  
9  
10 continued criminalisation and policing of clients, even in a context where sex workers no  
11  
12 longer represent police targets, did not reduce the prevalence of sex work related  
13  
14 violence and profoundly impacted sex workers' ability to negotiate their working  
15  
16 conditions, health and safety, including protections from violence, abuse and HIV/STI  
17  
18 infection. Sex workers were displaced to isolated areas with few protections from  
19  
20 violence and abuse; were forced to rush or forgo screening clients and negotiating the  
21  
22 terms of transactions (e.g. fee, condom use) and agree to clients or sexual services they  
23  
24 would otherwise refuse; and were unable to access police protections. The results also  
25  
26 highlight the critical role of sex workers' lived experiences in any evidence-based policy  
27  
28 making in Canada and globally. Two decades of failures of prostitution laws in Canada  
29  
30 stemmed from failure of consecutive governments to listen to strong evidence by sex  
31  
32 workers, academics and human rights experts that the laws were creating and  
33  
34 exacerbating devastating harms to sex workers' safety, health and human rights,  
35  
36 including violence, abuse and murder. In sum, this study raises serious questions about  
37  
38 legislative approaches that criminalize clients and suggests that 'demand criminalisation'  
39  
40 risks reproducing the devastating harms to health safety and human rights created by  
41  
42 the criminalisation of sex workers.  
43  
44  
45  
46  
47  
48  
49  
50  
51  
52  
53  
54  
55  
56  
57  
58  
59  
60

**ACKNOWLEDGEMENTS**

We thank all the women who contributed their time and expertise to this project, as well as research, community partners, and advisory board members. We wish to acknowledge Peter Vann, Gina Willis and Jennifer Morris for their research and administrative support.

**COMPETING INTERESTS**

None

**FUNDING**

This research was supported by operating grants from the US National Institutes of Health (R01DA033147) and Canadian Institutes of Health Research. KS is partially supported by US National Institutes of Health (R01DA028648), Canadian Institutes of Health Research and Michael Smith Foundation for Health Research. JM is supported by the British Columbia Ministry of Health and by the US National Institutes of Health (R01DA036307).

**CONTRIBUTORS**

KS is the principal investigator and senior author of the study and takes full responsibility for the integrity of the study procedures and data collection, management and analysis. AK, KP, JC, KS conceptualized this study and AK oversaw the field team carrying out the study. AK, CT conducted the interviews. AK, JC conducted the ethnographic observation. AK analyzed the data using Atlas software, wrote the original

1  
2  
3  
4  
5  
6  
7  
8  
9  
10  
11  
12  
13  
14  
15  
16  
17  
18  
19  
20  
21  
22  
23  
24  
25  
26  
27  
28  
29  
30  
31  
32  
33  
34  
35  
36  
37  
38  
39  
40  
41  
42  
43  
44  
45  
46  
47  
48  
49  
50  
51  
52  
53  
54  
55  
56  
57  
58  
59  
60

draft of the article and incorporated feedback from all co-authors. KP, CT, JC, LB, SA, DB, TK, JM, KS provided content expertise and critical feedback on the analyses and interpretation. All authors read and approved the final draft

For peer review only

## REFERENCES

1. WHO, UNAIDS, UNICEF. *Global HIV/AIDS Response: Epidemic Update and Health Sector Progress towards Universal Access*. Geneva: World Health Organization. 2011.  
[http://whqlibdoc.who.int/publications/2011/9789241502986\\_eng.pdf?ua=](http://whqlibdoc.who.int/publications/2011/9789241502986_eng.pdf?ua=)  
(accessed 7 Feb 2014).
2. Rhodes T, Simic M, Baros S, et al. Police violence and sexual risk among female and transvestite sex workers in Serbia: qualitative study. *BMJ* 2008;337.
3. Simić M, Rhodes T. Violence, dignity and HIV vulnerability: Street sex work in Serbia. *Sociol Health Illn* 2009;31:1-16.
4. Gruskin S, Williams Pierce G, Ferguson L. Realigning government action with public health evidence: the legal and policy environment affecting sex work and HIV in Asia. *Cult Health Sex* 2013:1-16.
5. Platt L, Jolley E, Rhodes T, et al. Factors mediating HIV risk among female sex workers in Europe: a systematic review and ecological analysis. *BMJ Open* 2013;3.
6. Shannon K, Csete J. Violence, condom negotiation, and HIV/STI risk among sex workers. *JAMA* 2010;304:573-74.
7. Platt L, Rhodes T, Judd A, et al. Effects of sex work on the prevalence of syphilis among injection drug users in 3 Russian cities. *Am J Public Health* 2007;97:478.
8. Shannon K, Montaner JG. The politics and policies of HIV prevention in sex work. *The Lancet Infectious Diseases* 2012;12:500.

- 1  
2  
3 9. Okal J, Chersich MF, Tsui S, et al. Sexual and physical violence against female sex  
4  
5 workers in Kenya: a qualitative enquiry. *AIDS Care* 2011;23:612-18.  
6  
7
- 8  
9 10. Shannon K, Kerr T, Allinott S, et al. Social and structural violence and power relations  
10  
11 in mitigating HIV risk of drug-using women in survival sex work. *Soc Sci Med*  
12  
13 2008;66:911-21.  
14  
15
- 16 11. Rekart ML. Sex-work harm reduction. *The Lancet* 2006;366:2123-34.  
17
- 18 12. Sanders T. The risks of street prostitution: Punters, police and protesters. *Urban*  
19  
20 *Studies* 2004;41:1703-17.  
21  
22
- 23 13. Lowman J. Violence and the outlaw status of (street) prostitution in Canada.  
24  
25 *Violence against Women* 2000;6:987-1011.  
26  
27
- 28 14. Sanders T, Campbell R. Designing out vulnerability, building in respect: violence,  
29  
30 safety and sex work policy. *Brit J Sociol* 2007;58:1-19.  
31  
32
- 33 15. Shannon K, Strathdee SA, Shoveller J, et al. Structural and environmental barriers to  
34  
35 condom use negotiation with clients among female sex workers: implications for  
36  
37 HIV-prevention strategies and policy. *Am J Public Health* 2009;99:659-65.  
38  
39
- 40 16. Maher L, Mooney-Somers J, Phlong P, et al. Selling sex in unsafe spaces: sex work  
41  
42 risk environments in Phnom Penh, Cambodia. *Harm Reduct J* 2011;8:30.  
43  
44
- 45 17. Krüsi A, Chettiar J, Ridgway A, et al. Negotiating Safety and Sexual Risk Reduction  
46  
47 With Clients in Unsanctioned Safer Indoor Sex Work Environments: A Qualitative  
48  
49 Study. *Am J Public Health*, 2012:1154-59.  
50  
51  
52  
53  
54  
55  
56  
57  
58  
59  
60

- 1  
2  
3  
4  
5  
6  
7  
8  
9  
10  
11  
12  
13  
14  
15  
16  
17  
18  
19  
20  
21  
22  
23  
24  
25  
26  
27  
28  
29  
30  
31  
32  
33  
34  
35  
36  
37  
38  
39  
40  
41  
42  
43  
44  
45  
46  
47  
48  
49  
50  
51  
52  
53  
54  
55  
56  
57  
58  
59  
60
18. Deering KN, Lyons T, Feng CX, et al. Client Demands for Unsafe Sex: The Socioeconomic Risk Environment for HIV Among Street and Off-Street Sex Workers. *JAIDS* 2013;63:522-31.
  19. Shannon K, Kerr T, Strathdee SA, et al. Prevalence and structural correlates of gender based violence among a prospective cohort of female sex workers. *BMJ* 2009;339.
  20. Lippman SA, Donini A, Diaz J, et al. Social-environmental factors and protective sexual behavior among sex workers: the Encontros intervention in Brazil. *Am J Public Health* 2010;100:S216-23.
  21. Kerrigan D, Ellen JM, Moreno L, et al. Environmental-structural factors significantly associated with consistent condom use among female sex workers in the Dominican Republic. *AIDS* 2003;17:415-23.
  22. Richter ML, Chersich MF, Scorgie F, et al. Sex work and the 2010 FIFA World Cup: time for public health imperatives to prevail. *Global Health* 2010;6:1.
  23. Lazarus L, Deering KN, Nabess R, et al. Occupational stigma as a primary barrier to health care for street-based sex workers in Canada. *Cult Health Sex* 2012;14:139-50.
  24. Boynton P, Cusick L. Sex workers to pay the price: UK plans to cut street prostitution will threaten sex workers' health. *BMJ* 2006;332:190.
  25. Scorgie F, Nakato D, Harper E, et al. We are despised in the hospitals: sex workers' experiences of accessing health care in four African countries. *Cult Health Sex* 2013;15:450-65.

- 1  
2  
3  
4 26. Oppenheim M. MEPs vote to criminalise buying sex. *The Guardian* 2014 26 February  
5  
6 2014.  
7  
8  
9 27. Goodyear M, Weitzer R. International trends in the control of sexual services.  
10  
11 *Policing pleasure: Sex work, policy and the state in globalperspective, ed. S.*  
12  
13 *Dewey and P. Kelly* 2011:16-30.  
14  
15  
16 28. Scoular J. Criminalizing 'punters': evaluating the Swedish position on prostitution.  
17  
18 *Journal of Social Welfare and Family Law* 2004;26:195-210.  
19  
20  
21 29. Global Commission on HIV and the Law. *HIV and the Law: Risks, Rights, & Health.*  
22  
23 2012. [http://www.undp.org/content/dam/undp/library/HIV-AIDS/Governance of](http://www.undp.org/content/dam/undp/library/HIV-AIDS/Governance%20of%20HIV%20Responses/Commissions%20report%20final-EN.pdf)  
24  
25 [HIV Responses/Commissions report final-EN.pdf](http://www.undp.org/content/dam/undp/library/HIV-AIDS/Governance%20of%20HIV%20Responses/Commissions%20report%20final-EN.pdf) (accessed 4 Feb 2014)  
26  
27  
28 30. Canada Supreme Court. *Decision, Canada (Attorney General) vs. Bedford, Ottawa:*  
29  
30 Supreme Court of Canada; 2013. [http://scc-csc.lexum.com/decisia-scc-csc/scc-](http://scc-csc.lexum.com/decisia-scc-csc/scc-csc/scc-csc/en/item/13389/index.do)  
31  
32 [csc/scc-csc/en/item/13389/index.do](http://scc-csc.lexum.com/decisia-scc-csc/scc-csc/scc-csc/en/item/13389/index.do) (accessed 3 Feb 2014)  
33  
34  
35 31. Crawford A. Peter MacKay faces balancing act with justice agenda, court rulings.  
36  
37 *Canadian Broadcasting Corporatio.* January 27 2014.  
38  
39 [http://www.cbc.ca/news/politics/peter-mackay-faces-balancing-act-with-justice-](http://www.cbc.ca/news/politics/peter-mackay-faces-balancing-act-with-justice-agenda-court-rulings-1.2511220)  
40  
41 [agenda-court-rulings-1.2511220](http://www.cbc.ca/news/politics/peter-mackay-faces-balancing-act-with-justice-agenda-court-rulings-1.2511220) (accessed 2 Mar 2014)  
42  
43  
44 32. Oppal W. Forsaken: The Report on the Missing and Murdered Women Commission  
45  
46 of Inquiry. British Columbia, 2012.  
47  
48 [http://www.ag.gov.bc.ca/public\\_inquiries/docs/Forsaken-ES.pdf](http://www.ag.gov.bc.ca/public_inquiries/docs/Forsaken-ES.pdf) (accessed 3  
49  
50 Mar 2014).  
51  
52  
53  
54  
55  
56  
57  
58  
59  
60



- 1  
2  
3  
4  
5  
6  
7  
8  
9  
10  
11  
12  
13  
14  
15  
16  
17  
18  
19  
20  
21  
22  
23  
24  
25  
26  
27  
28  
29  
30  
31  
32  
33  
34  
35  
36  
37  
38  
39  
40  
41  
42  
43  
44  
45  
46  
47  
48  
49  
50  
51  
52  
53  
54  
55  
56  
57  
58  
59  
60
33. Vancouver Police Department. Sex work enforcement guidelines, 2013.  
<http://vancouver.ca/police/assets/pdf/reports-policies/sex-enforcement-guidelines.pdf> (accessed 7 Jan 2014).
34. Vancouver Police Department. *Counter Exploitation Unit*.  
<http://vancouver.ca/police/organization/investigation/investigative-services/special-investigation/vice.html> (accessed 7 Jan 2014).
35. Shannon K, Bright V, Allinott S, et al. Community-based HIV prevention research among substance-using women in survival sex work: The Maka Project Partnership. *Harm Reduct J* 2007;4:20.
36. Vancouver Police Department. *Statistical Reports by District and City totals*.  
<https://vancouver.ca/police/Planning/StatsDistrict/2013/2012-2013YTD.pdf> (accessed 7 Jan 2014).
37. Decker MR, McCauley HL, Phuengsamran D, et al. Violence victimisation, sexual risk and sexually transmitted infection symptoms among female sex workers in Thailand. *Sex Transm Infect* 2010;86:236-40.
38. Decker MR, Wirtz AL, Baral SD, et al. Injection drug use, sexual risk, violence and STI/HIV among Moscow female sex workers. *Sex Transm Infect* 2012;88:278-83.
39. Bruckert C, Hannem S. Rethinking the Prostitution Debates: Transcending Structural Stigma in Systemic Responses to Sex Work. *Canadian Journal of Law and Society* 2013;28:43-63.
40. Abel G, Fitzgerald L, Brunton C. The impact of decriminalisation on the number of sex workers in New Zealand. *J Soc Policy* 2009;38:515-31.

1  
2  
3  
4  
5  
6  
7  
8  
9  
10  
11  
12  
13  
14  
15  
16  
17  
18  
19  
20  
21  
22  
23  
24  
25  
26  
27  
28  
29  
30  
31  
32  
33  
34  
35  
36  
37  
38  
39  
40  
41  
42  
43  
44  
45  
46  
47  
48  
49  
50  
51  
52  
53  
54  
55  
56  
57  
58  
59  
60

For peer review only

## Supplementary Materials:

**Table 1: Criminalisation and Legislative Approaches to Sex Work**

**Criminalisation:** Selling and purchasing sexual services is illegal. Examples include: most parts of the US (except Nevada), large parts of Eastern Europe including Russia, large parts of Asia, including China and large parts of Africa including Uganda.

**Quasi-Criminalisation:** Selling and purchasing sexual services is not illegal but most surrounding activities are. This includes the prohibition of communicating for prostitution, living off the avails of prostitution, keeping a brothel and soliciting sexual transactions in public spaces. Examples include Canada, UK.

**Demand Criminalisation:** The purchase of sexual services is illegal while selling sex is not illegal. Demand criminalisation was first implemented in Sweden in 1999. The primary objective of this approach is to eradicate prostitution by eliminating demand. However, evidence from Sweden, indicates that the law has been unsuccessful in meeting this objective. Examples include: Sweden, Norway, Iceland, and France.

**Legalization:** Sex work is permitted under certain state-specified conditions such as in licensed brothels or sex work zones and heavily regulated through targeted regulations of sex work businesses (e.g. often highly punitive; compulsory registration or mandatory health checks) generally in the absence of labour rights. This legal approach includes, brothels in Nevada, USA, and sex work zones in the Netherland.

**Decriminalization of Sex Work:** The removal of all laws that criminalize sex work. Sex work is subject to the same regulations, licensing and zoning as other businesses. Sex workers have the same labour protections as employees in other sectors, e.g. workplace health and safety standards. In case of violence or theft, the standard Criminal code applies. Examples include New Zealand and New South Wales, Australia.

1  
2  
3  
4  
5  
6  
7  
8  
9  
10  
11  
12  
13  
14  
15  
16  
17  
18  
19  
20  
21  
22  
23  
24  
25  
26  
27  
28  
29  
30  
31  
32  
33  
34  
35  
36  
37  
38  
39  
40  
41  
42  
43  
44  
45  
46  
47  
48  
49  
50  
51  
52  
53  
54  
55  
56  
57  
58  
59  
60

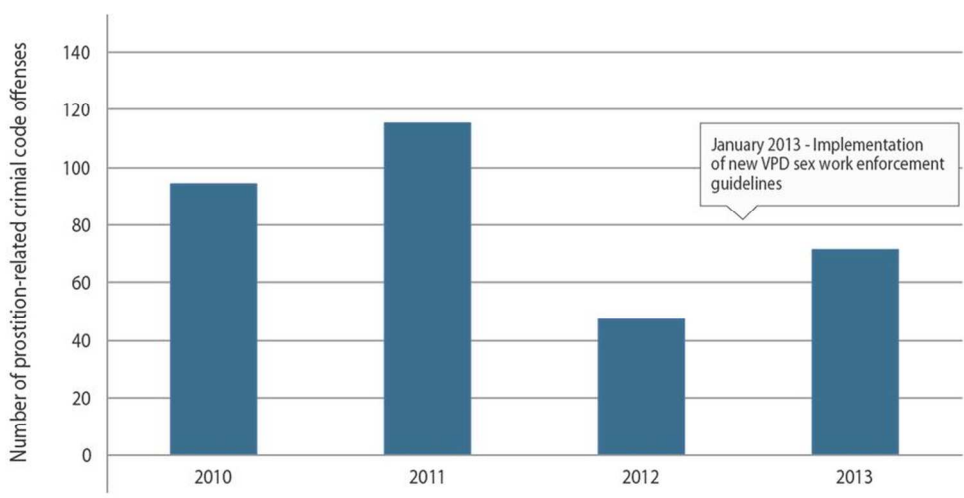

168x90mm (300 x 300 DPI)

review only
